# Supplementary material for: Photoswitchable nonlinear optical properties of azobenzene-based supramolecular complexes: insights from density functional theory
Source: Royal Society of Chemistry journal article supplement (doi:10.1039/d3cp01498c), 2023-01-01
Supplement: d3cp01498c1.pdf [file d3cp01498c1.pdf]

## **Photoswitchable Nonlinear Optical Properties of Azobenzene-Based Supramolecular Complexes: Insights From Density Functional Theory**

Aqsa Nisar<sup>1</sup>, Sobia Tabassum<sup>2</sup>, Khurshid Ayub<sup>3</sup>, Tariq Mahmood<sup>3, 4</sup>, Hamad AlMohamadi<sup>5</sup>, Asim Laeeq Khan<sup>6</sup>, Muhammad Yasin<sup>6</sup>, R. Nawaz<sup>7</sup>, Mazhar Amjad Gilani<sup>1\*</sup>

<sup>1</sup>Department of Chemistry, COMSATS University Islamabad, Lahore Campus, Lahore-54600, Pakistan

<sup>2</sup>Interdisciplinary Research Centre in Biomedical Materials (IRCBM), COMSATS University Islamabad, Lahore Campus, Lahore-54600, Pakistan

<sup>3</sup>Department of Chemistry, COMSATS University Islamabad, Abbottabad Campus, Abbottabad-22060, Pakistan

<sup>4</sup>Department of Chemistry, College of Science, University of Bahrain, Bahrain

<sup>5</sup>Department of Chemical Engineering, Faculty of Engineering, Islamic University of Madinah, Madinah, Saudi Arabia

<sup>6</sup>Department of Chemical Engineering, COMSATS University Islamabad, Lahore Campus, Lahore-54600, Pakistan

<sup>7</sup>Center for Applied Mathematics and Bioinformatics (CAMB), Gulf University for Science and Technology, 32093 Hawally, Kuwait

\*Corresponding Author

Mazhar Amjad Gilani

Email: [mazhargilani@cuilahore.edu.pk](mailto:mazhargilani@cuilahore.edu.pk)

## Figures

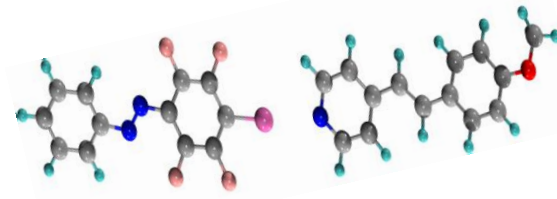

**IIA**

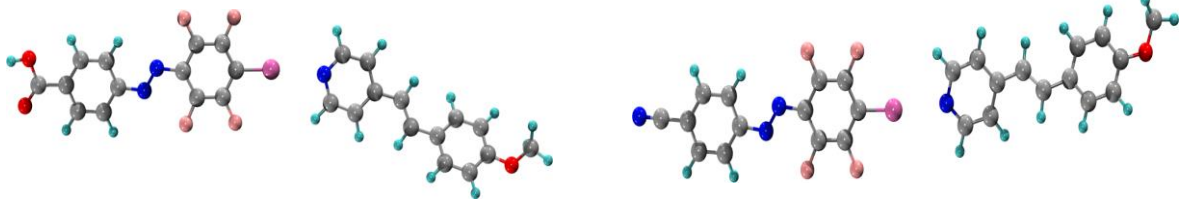

**IIB**

**IIC**

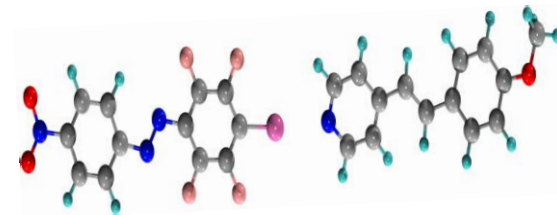

**IIE**

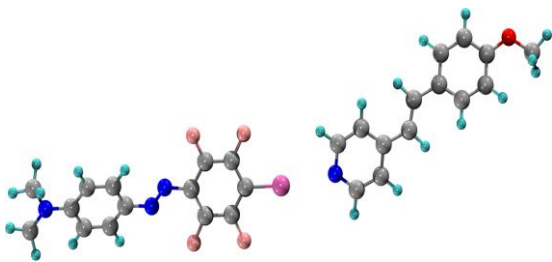

**IIE**

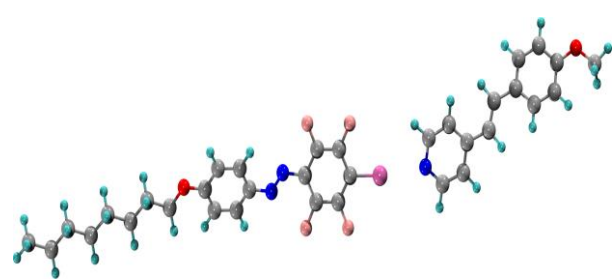

**IIF**

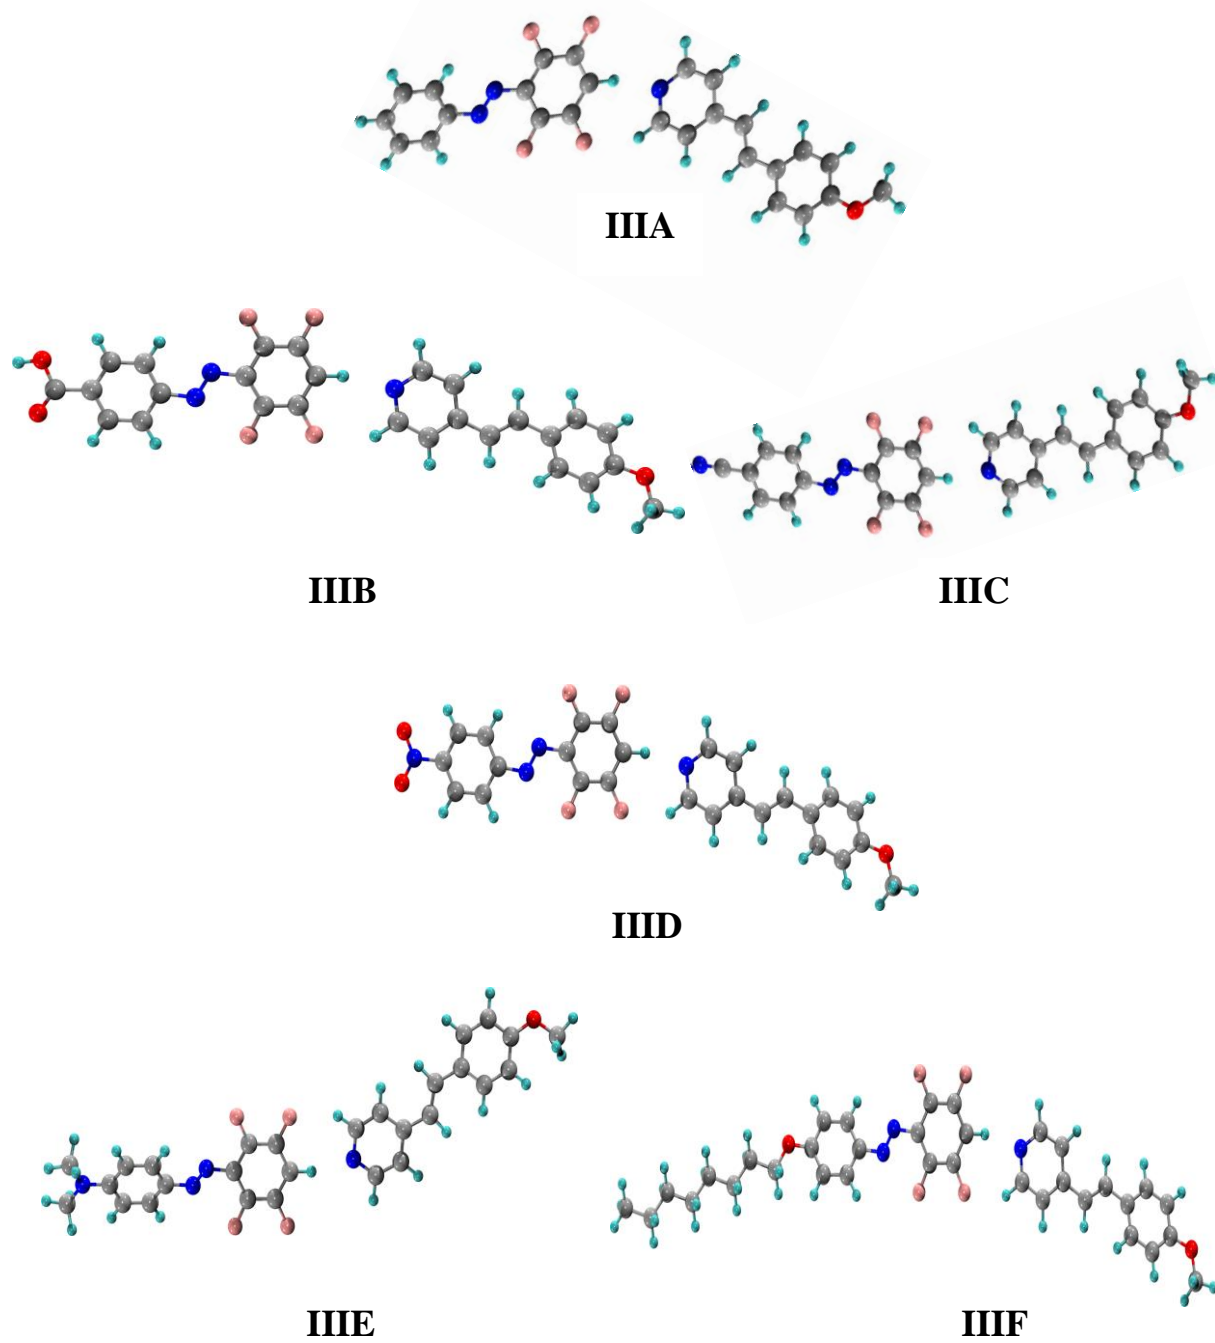

**Fig. S1:** Optimized geometries of **IIA-III** and **IIIA-III** complexes

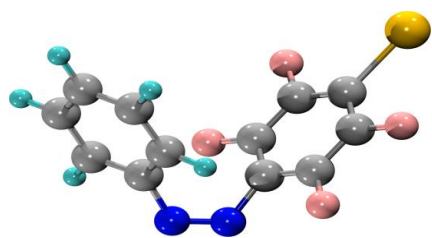

Cis Azo-I (i)

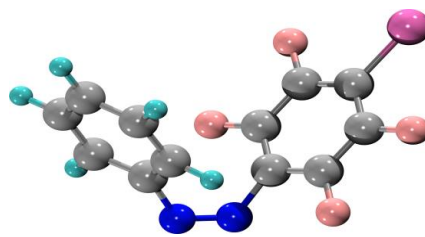

Cis Azo-Br (ii)

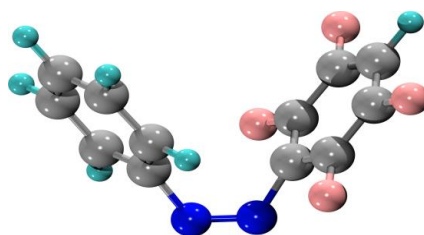

Cis Azo-H (iii)

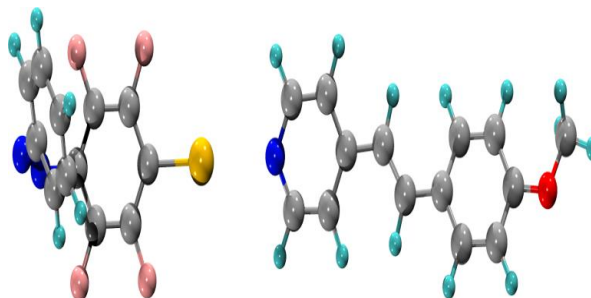

iA

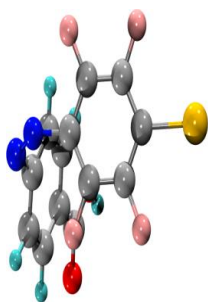

iB

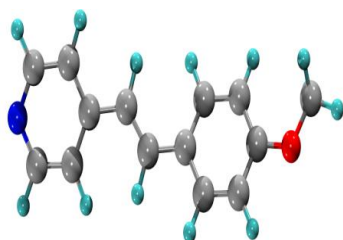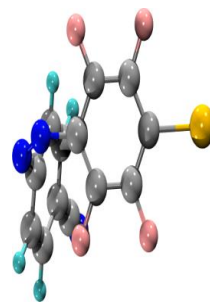

iC

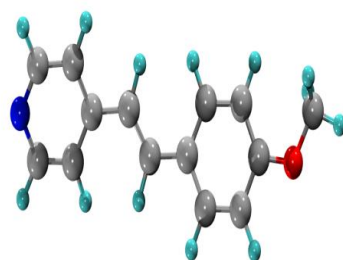

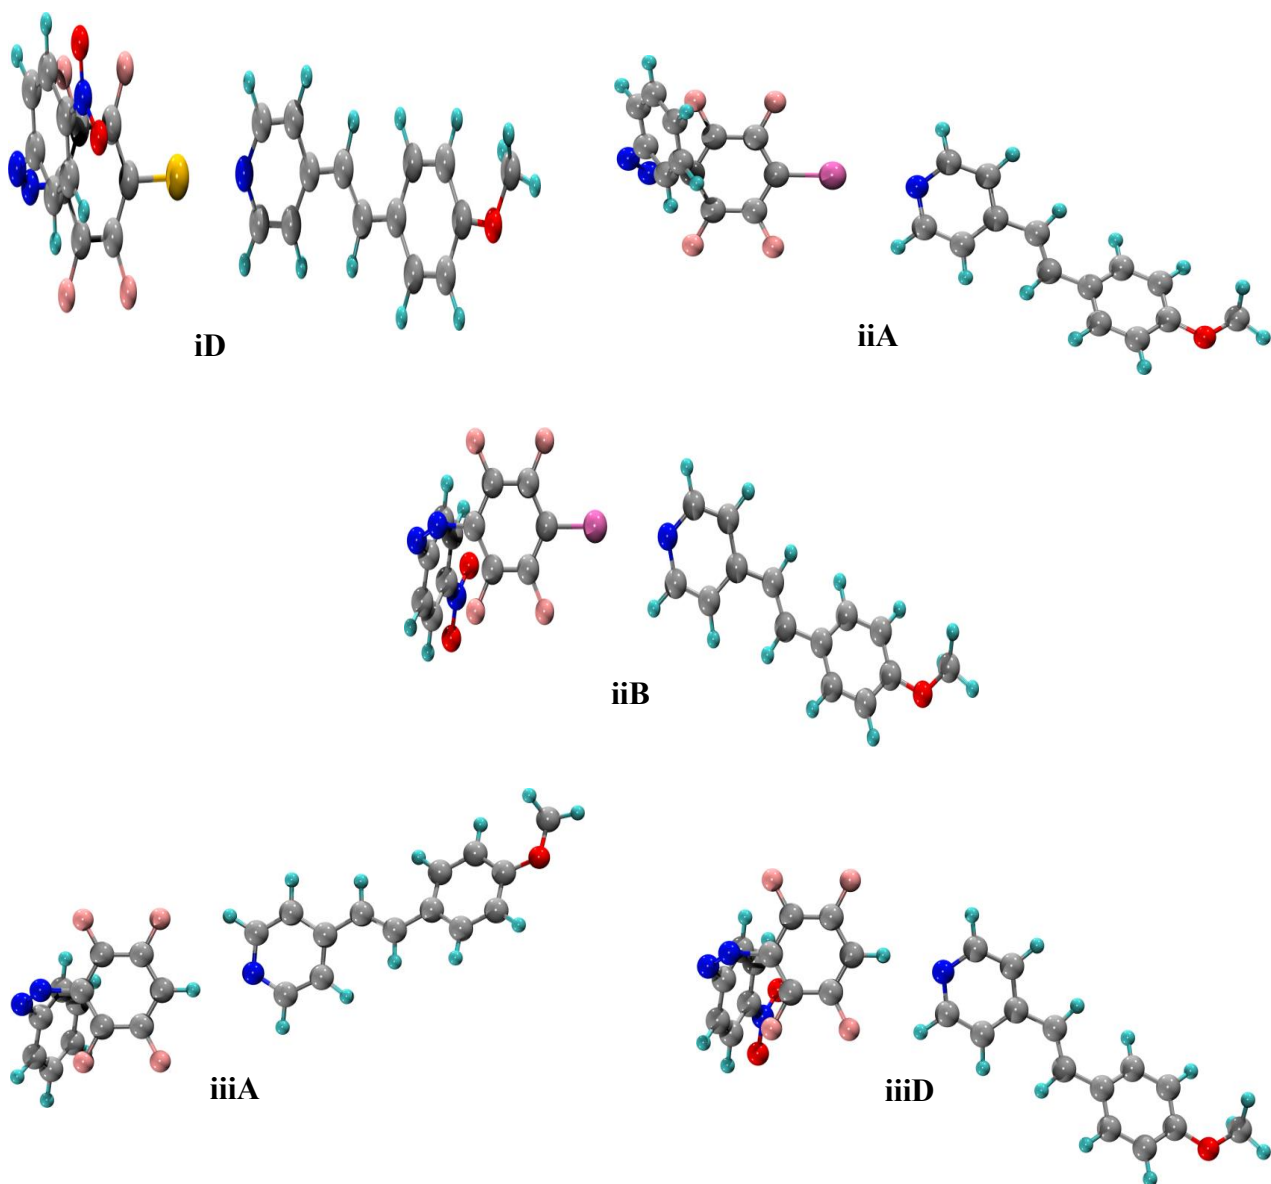

**Fig. S2:** Optimized geometries of *cis* Azo-X (where X=I, Br or H) and their supramolecular complexes

**HOMO**

**LUMO**

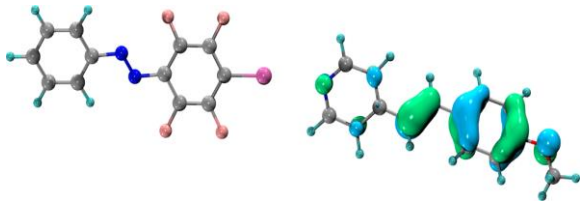

**IIA**

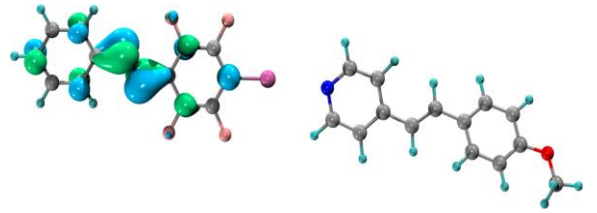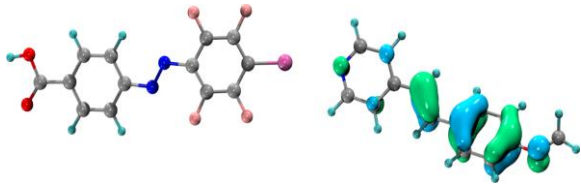

**IIB**

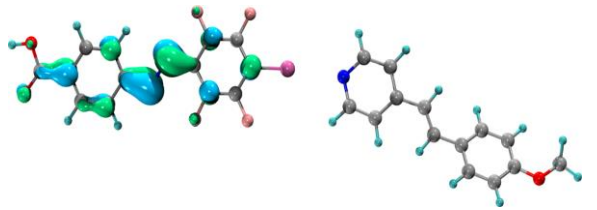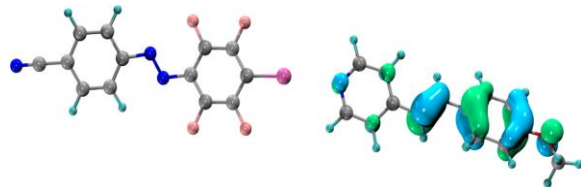

**IIC**

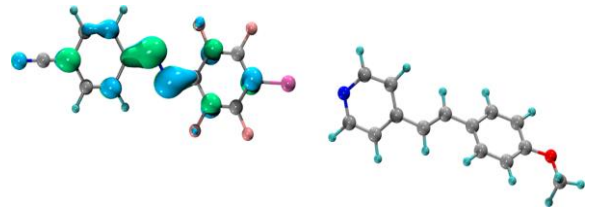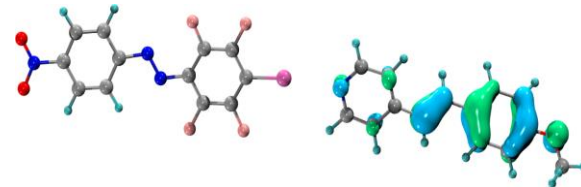

**IID**

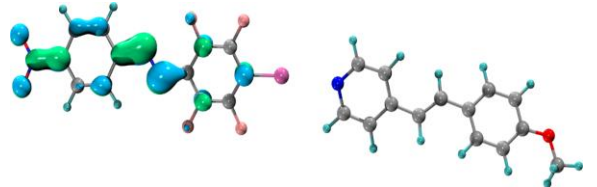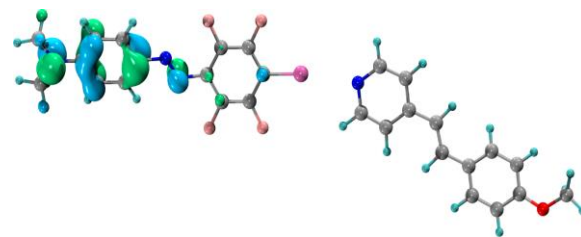

**IIE**

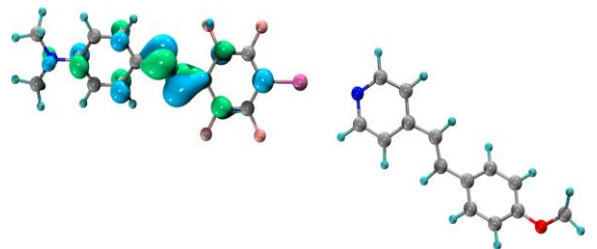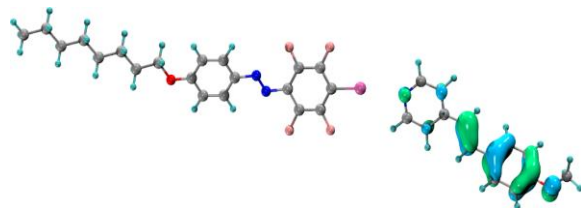

**IIF**

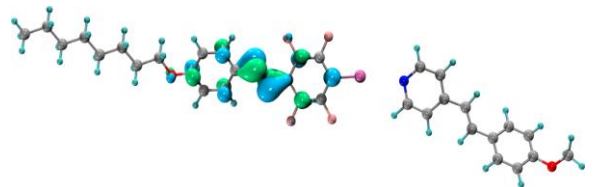

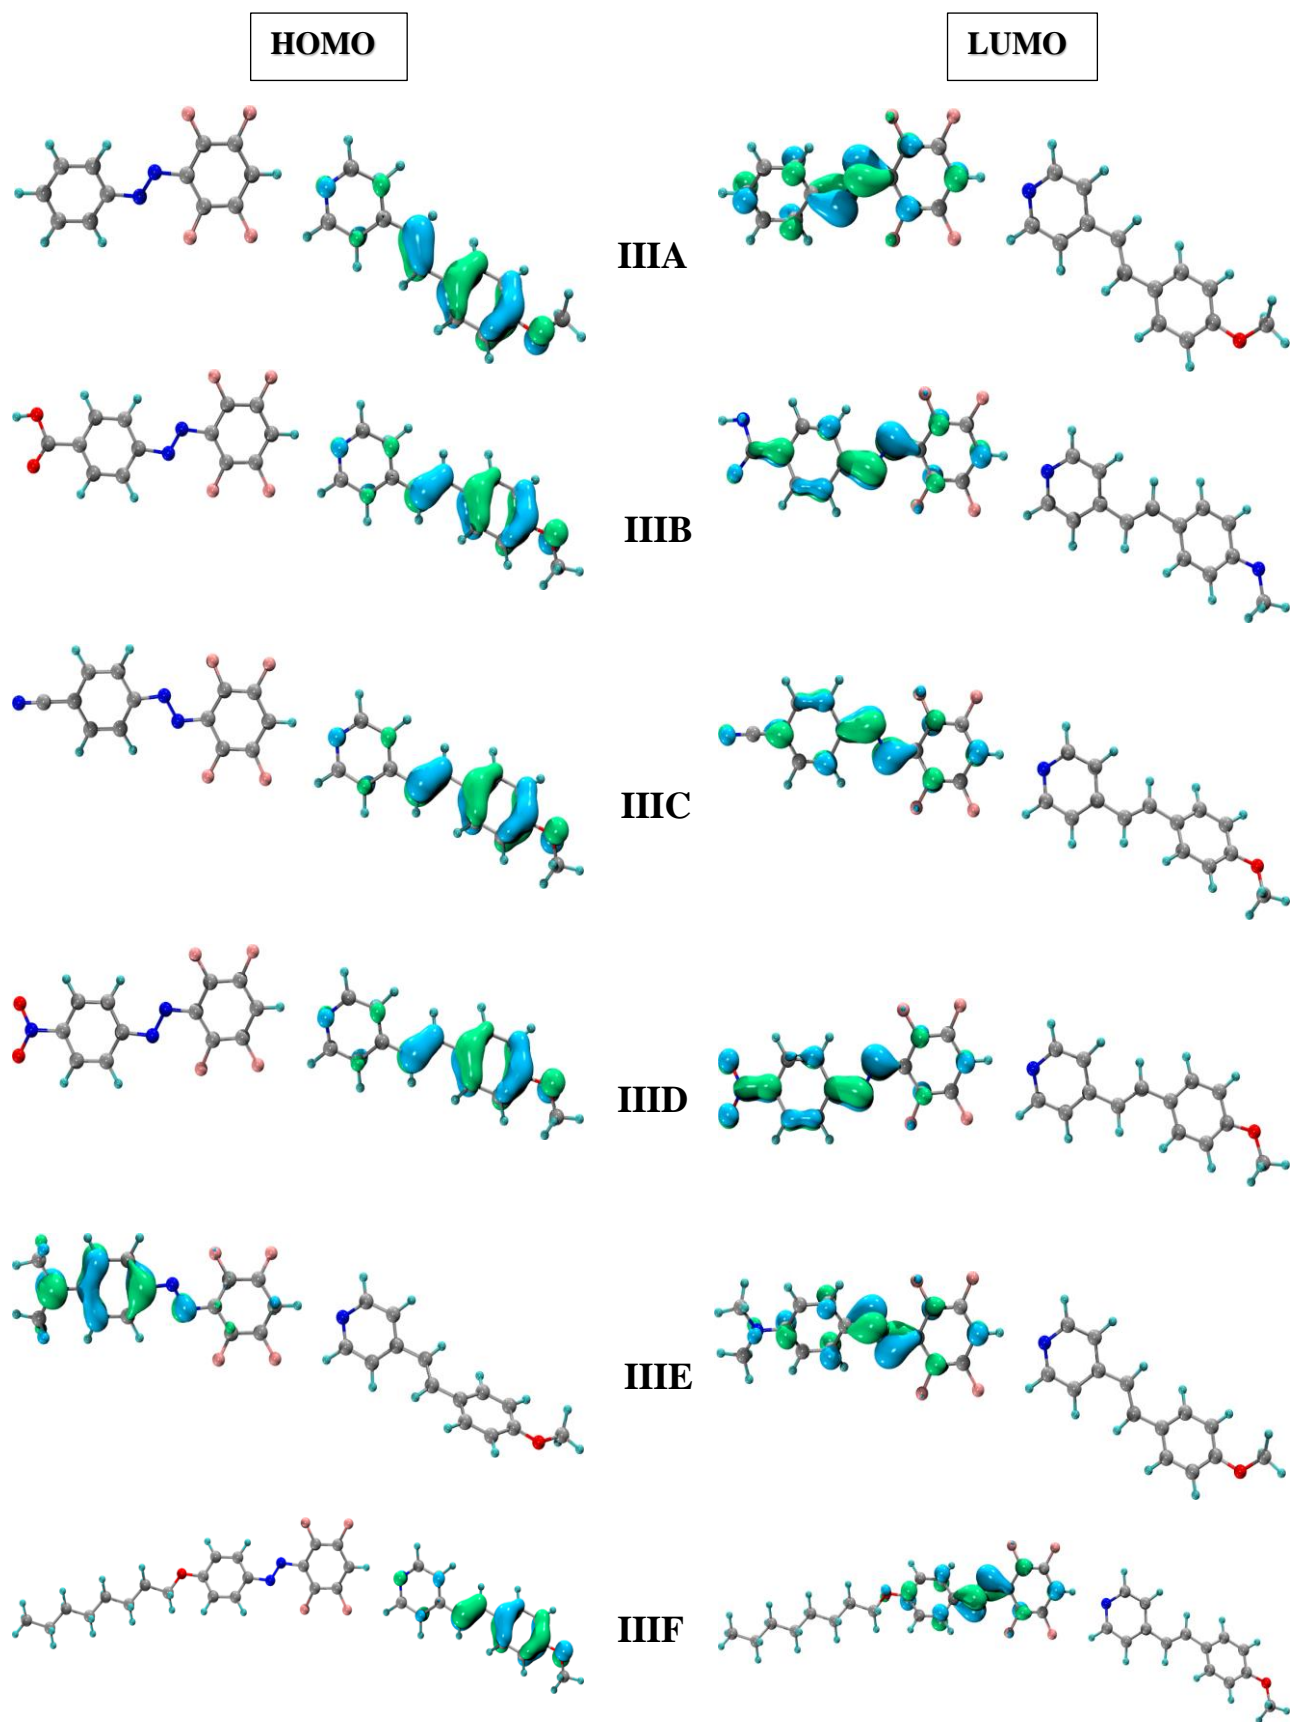

**Fig. S3:** HOMOs and LUMOs of **IIA-IIIF** and **IIIA-IIIF** complexes

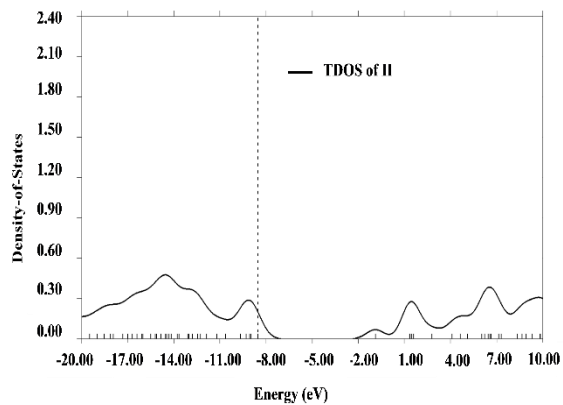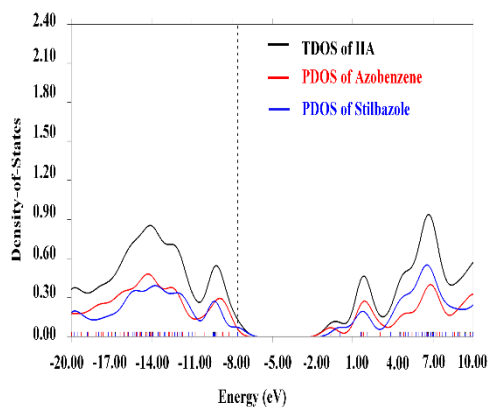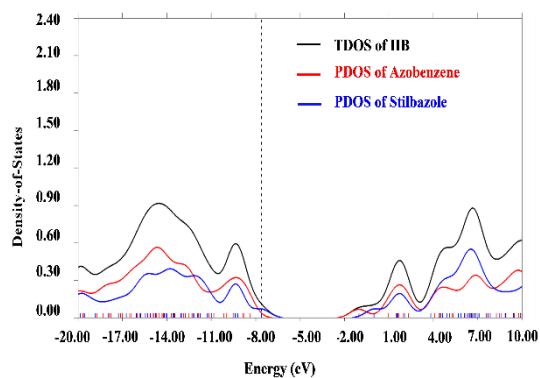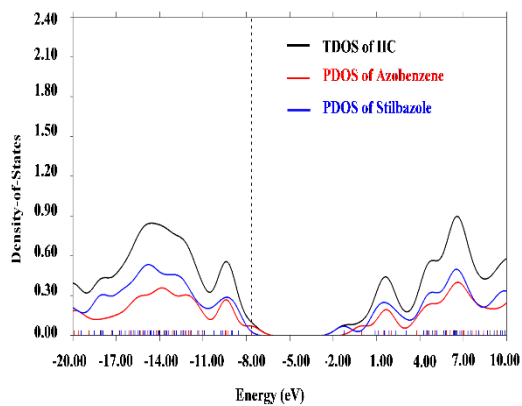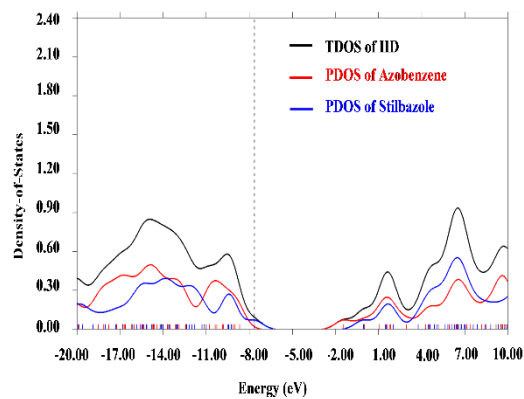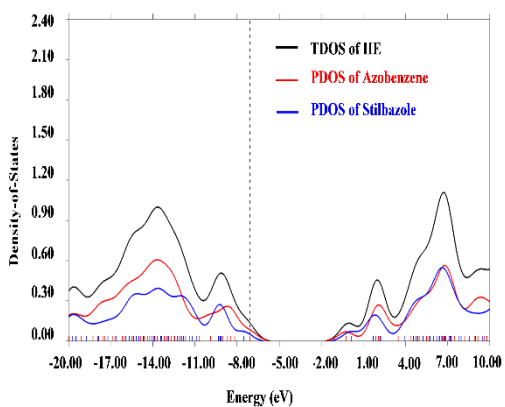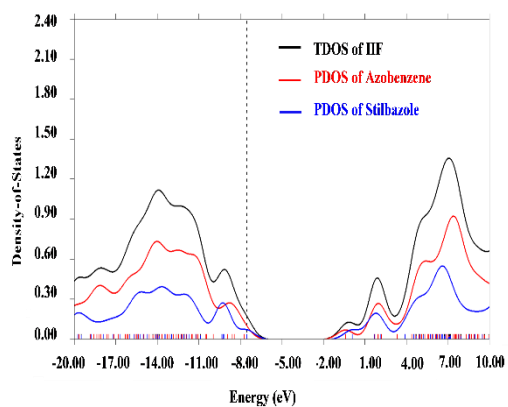



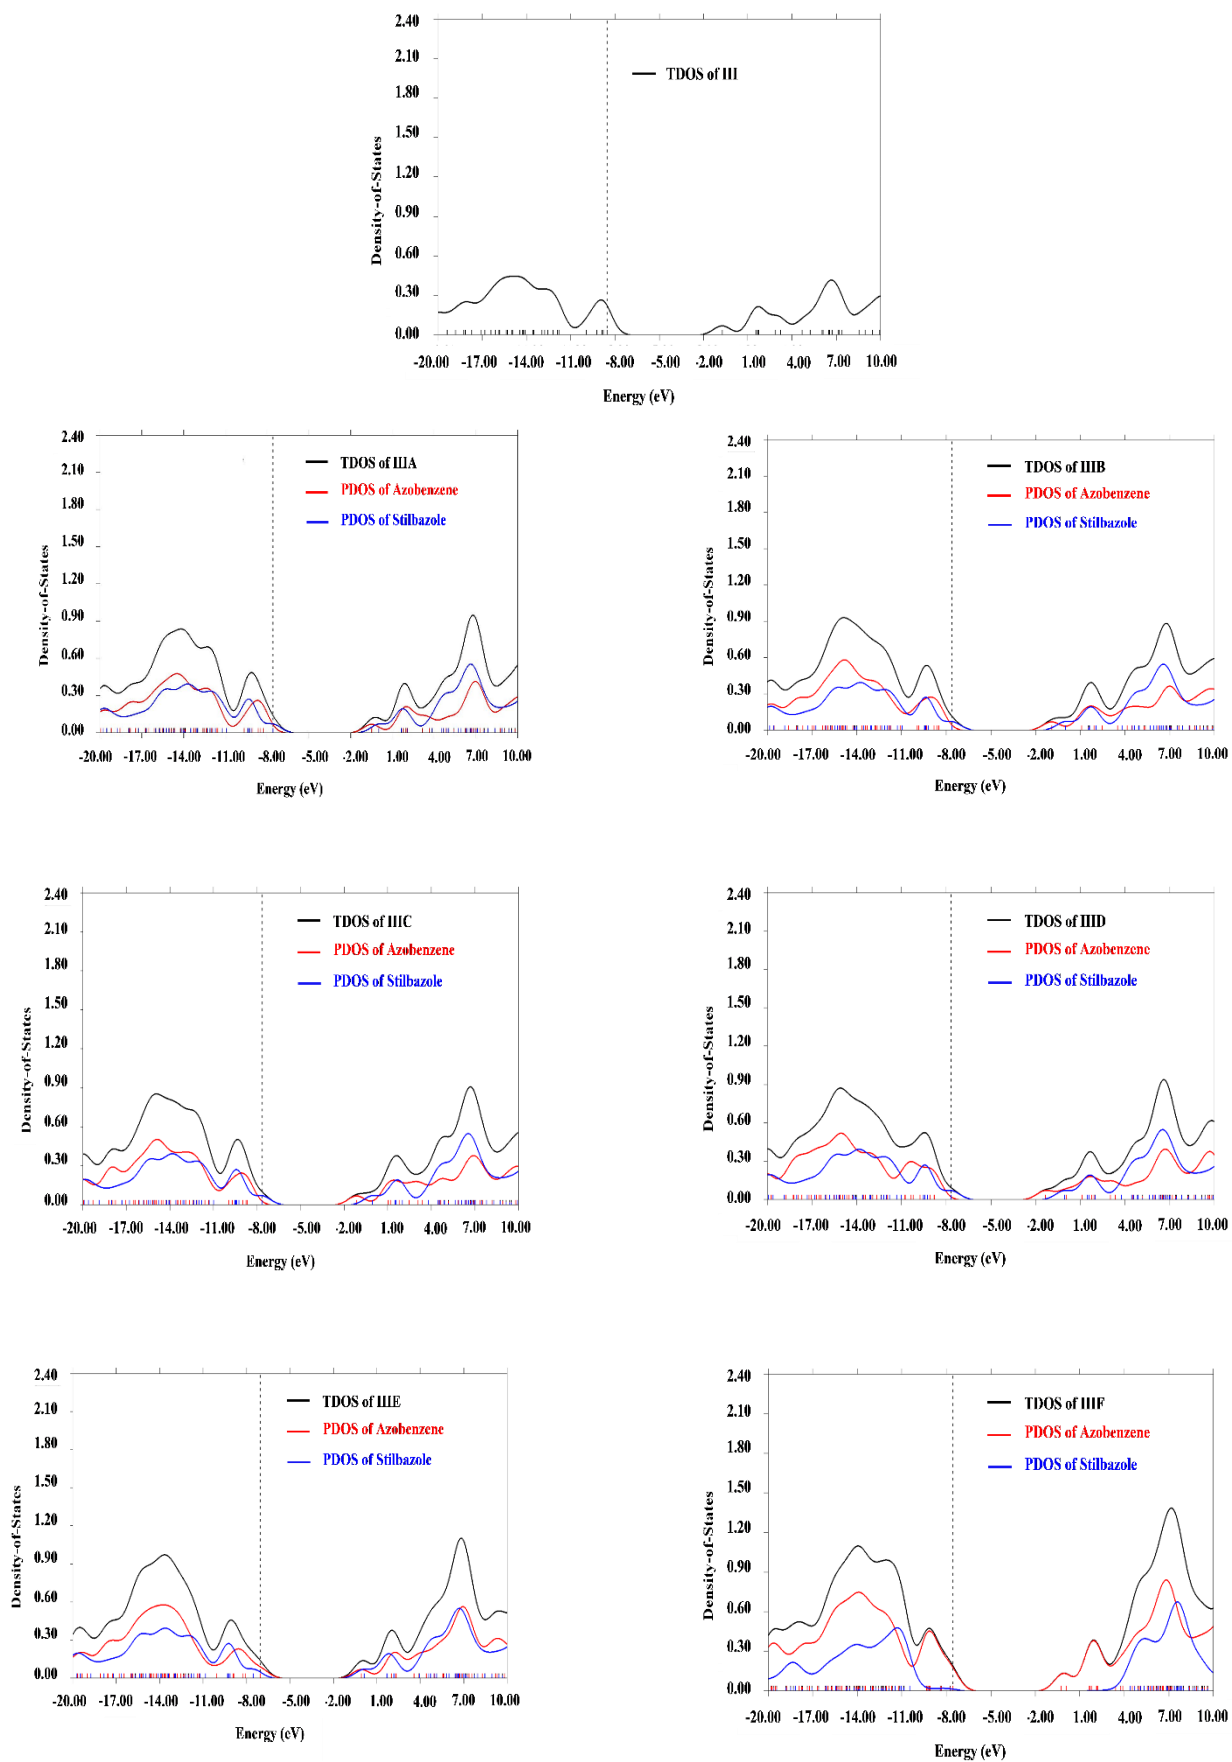

**Fig. S4:** TDOS and PDOS of Azo-Br, Azo-H, **IIA-IIIF** and **IIIA-IIIF** complexes

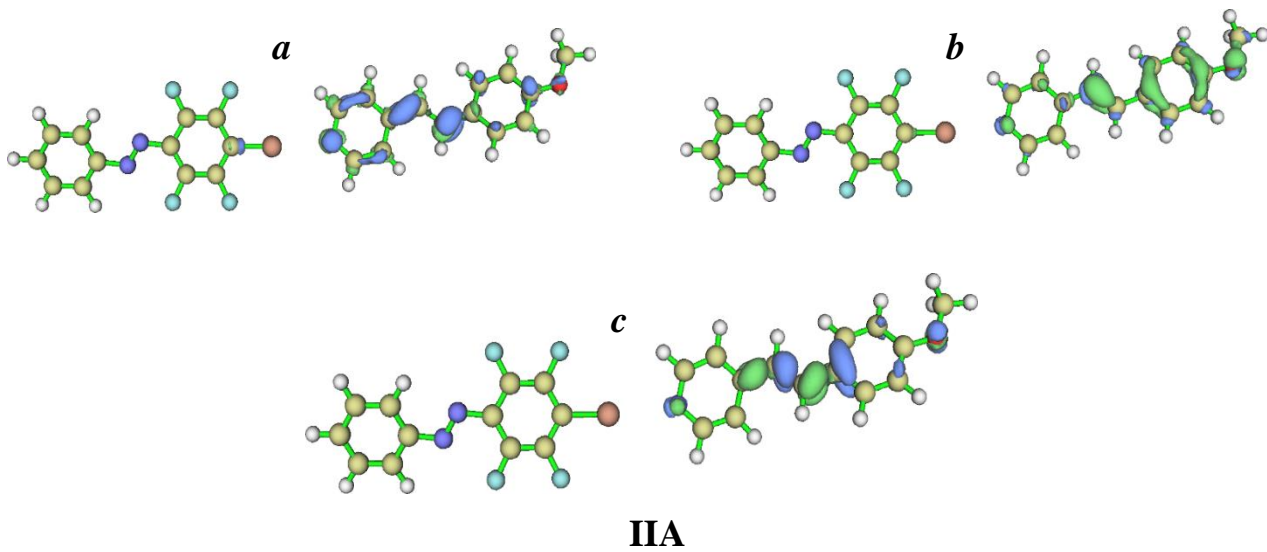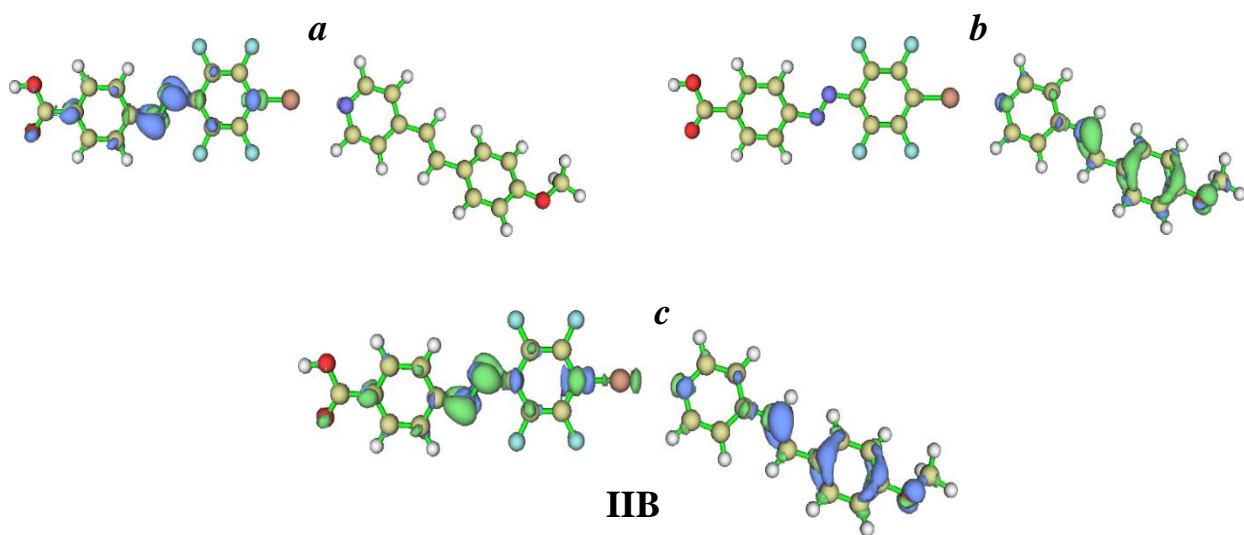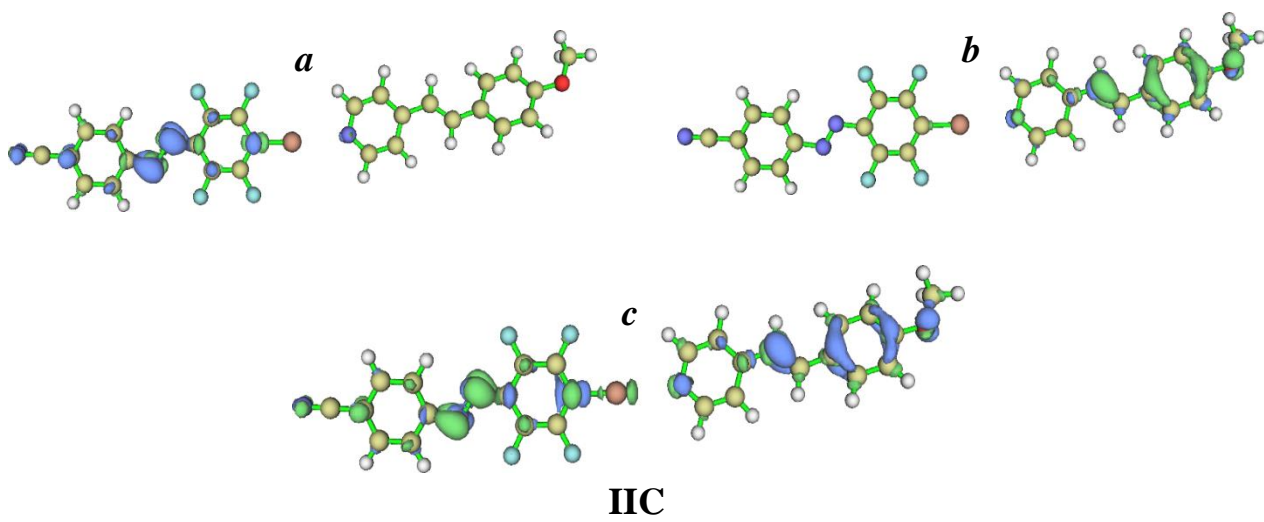

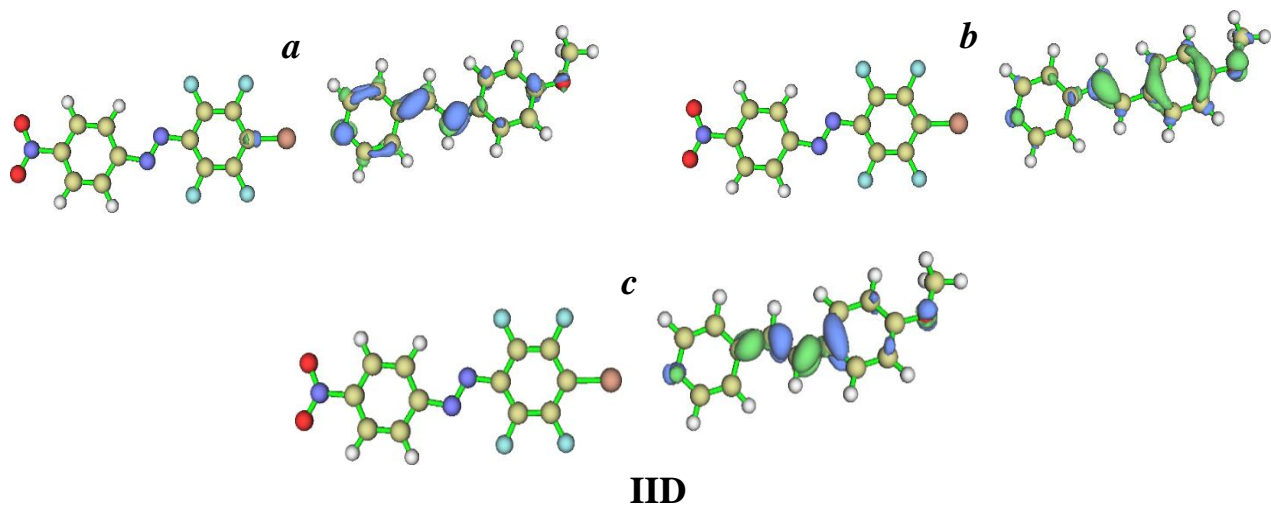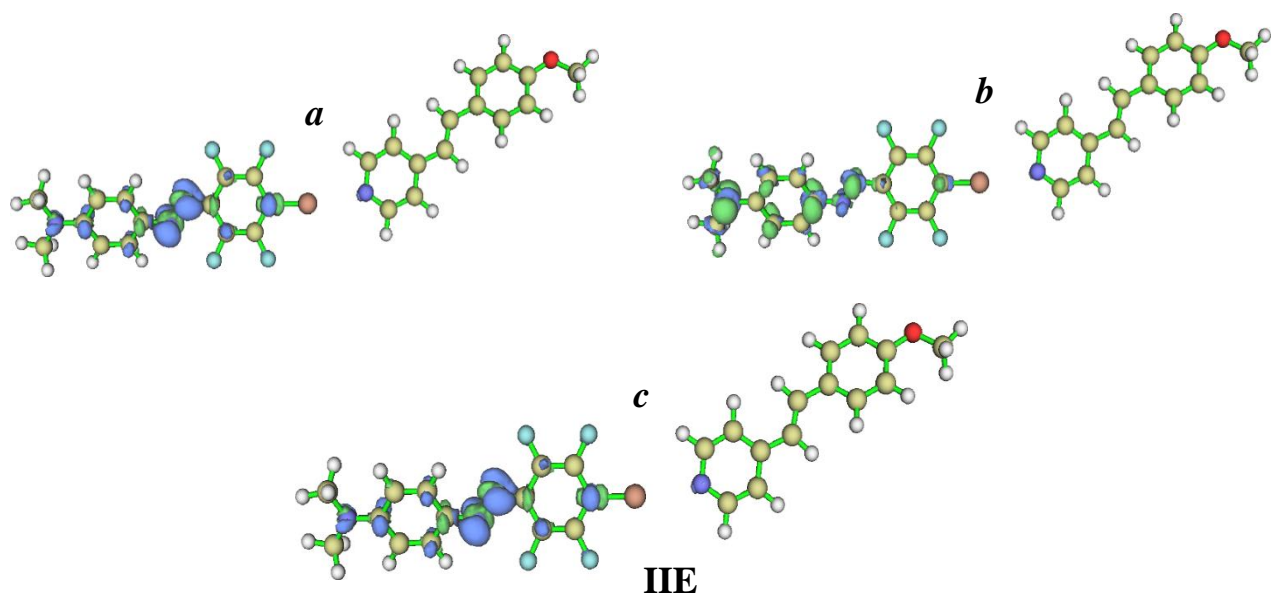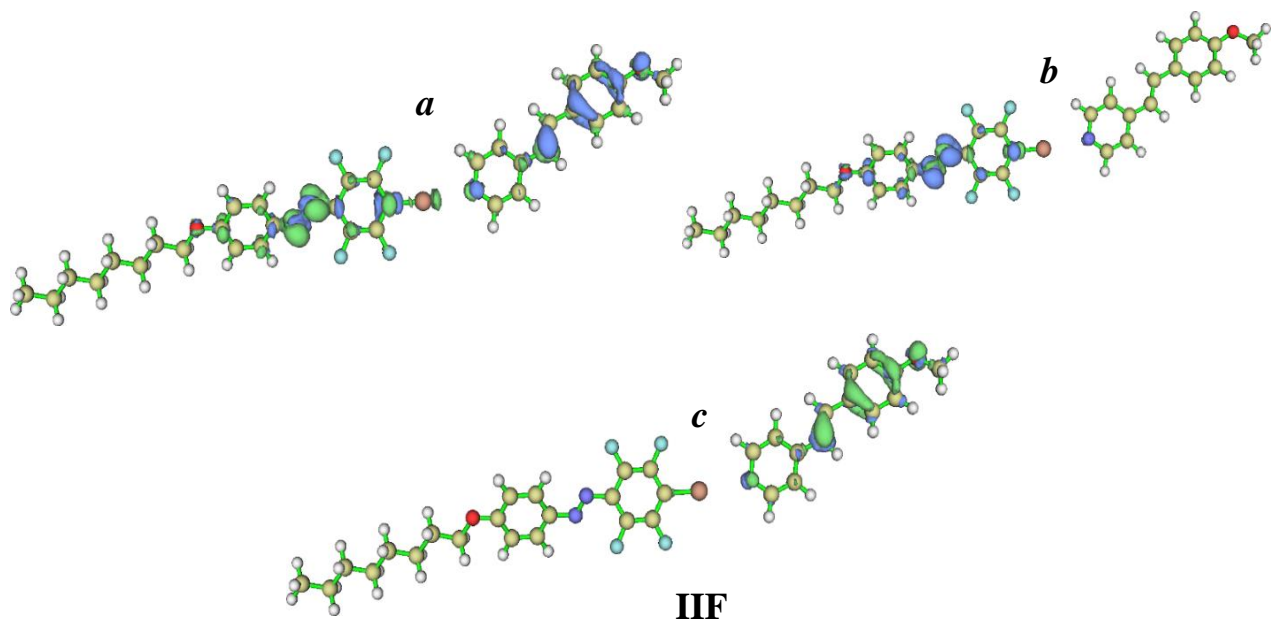

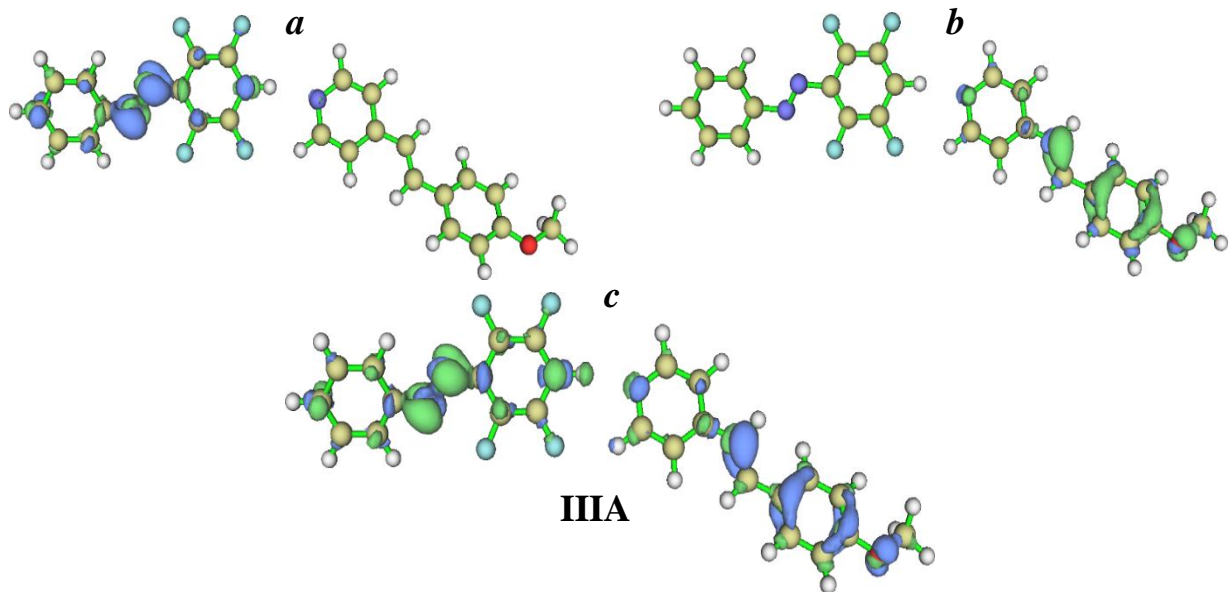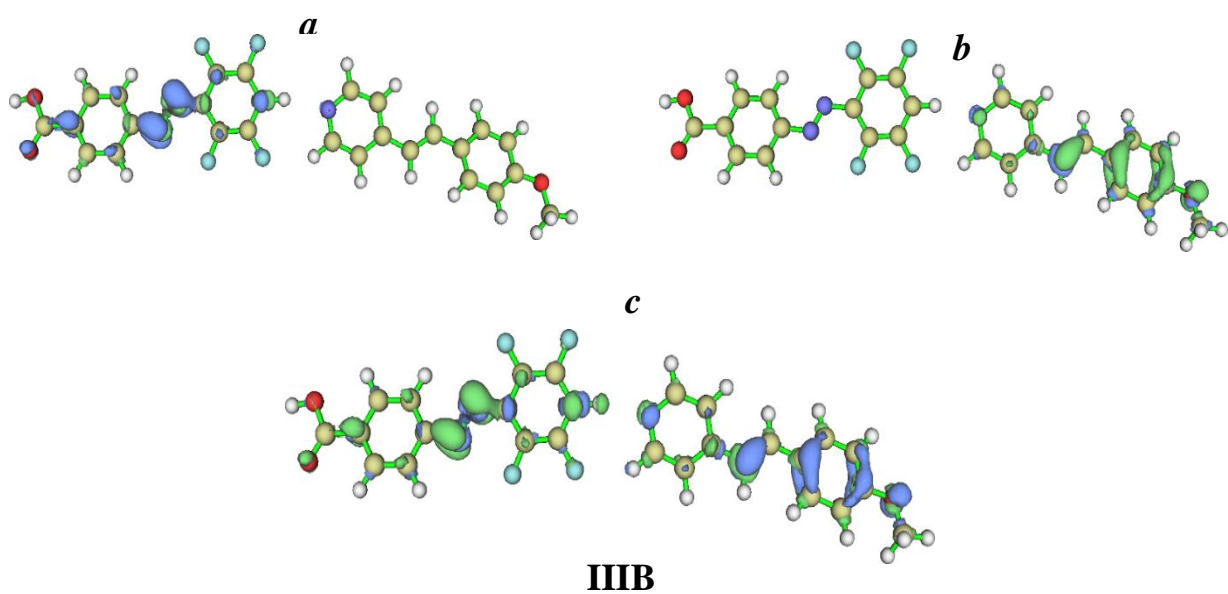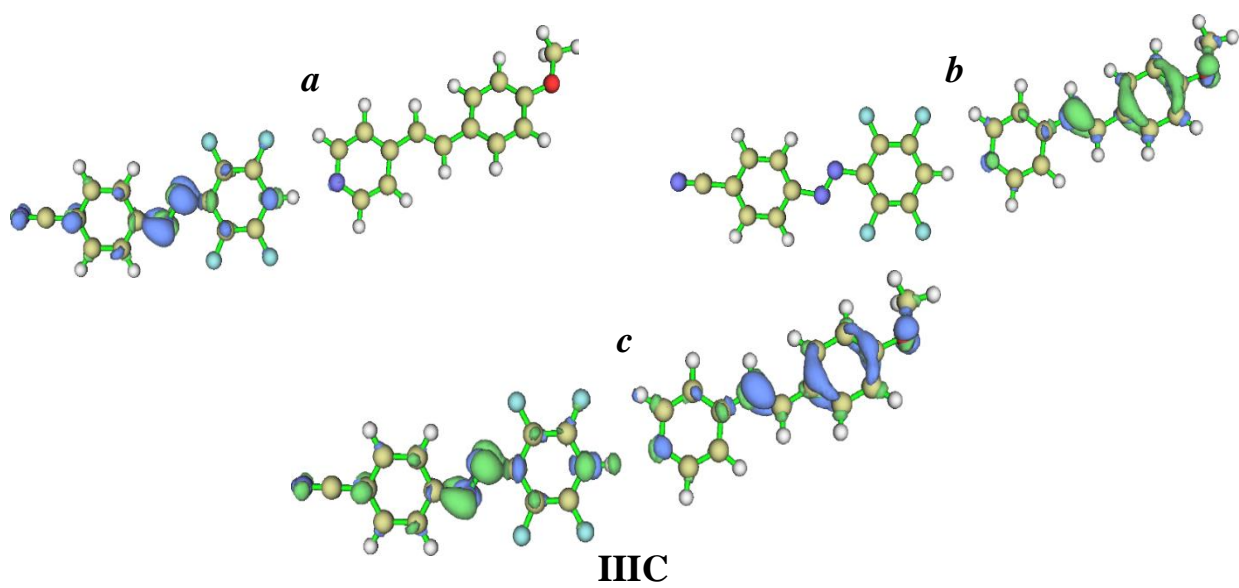

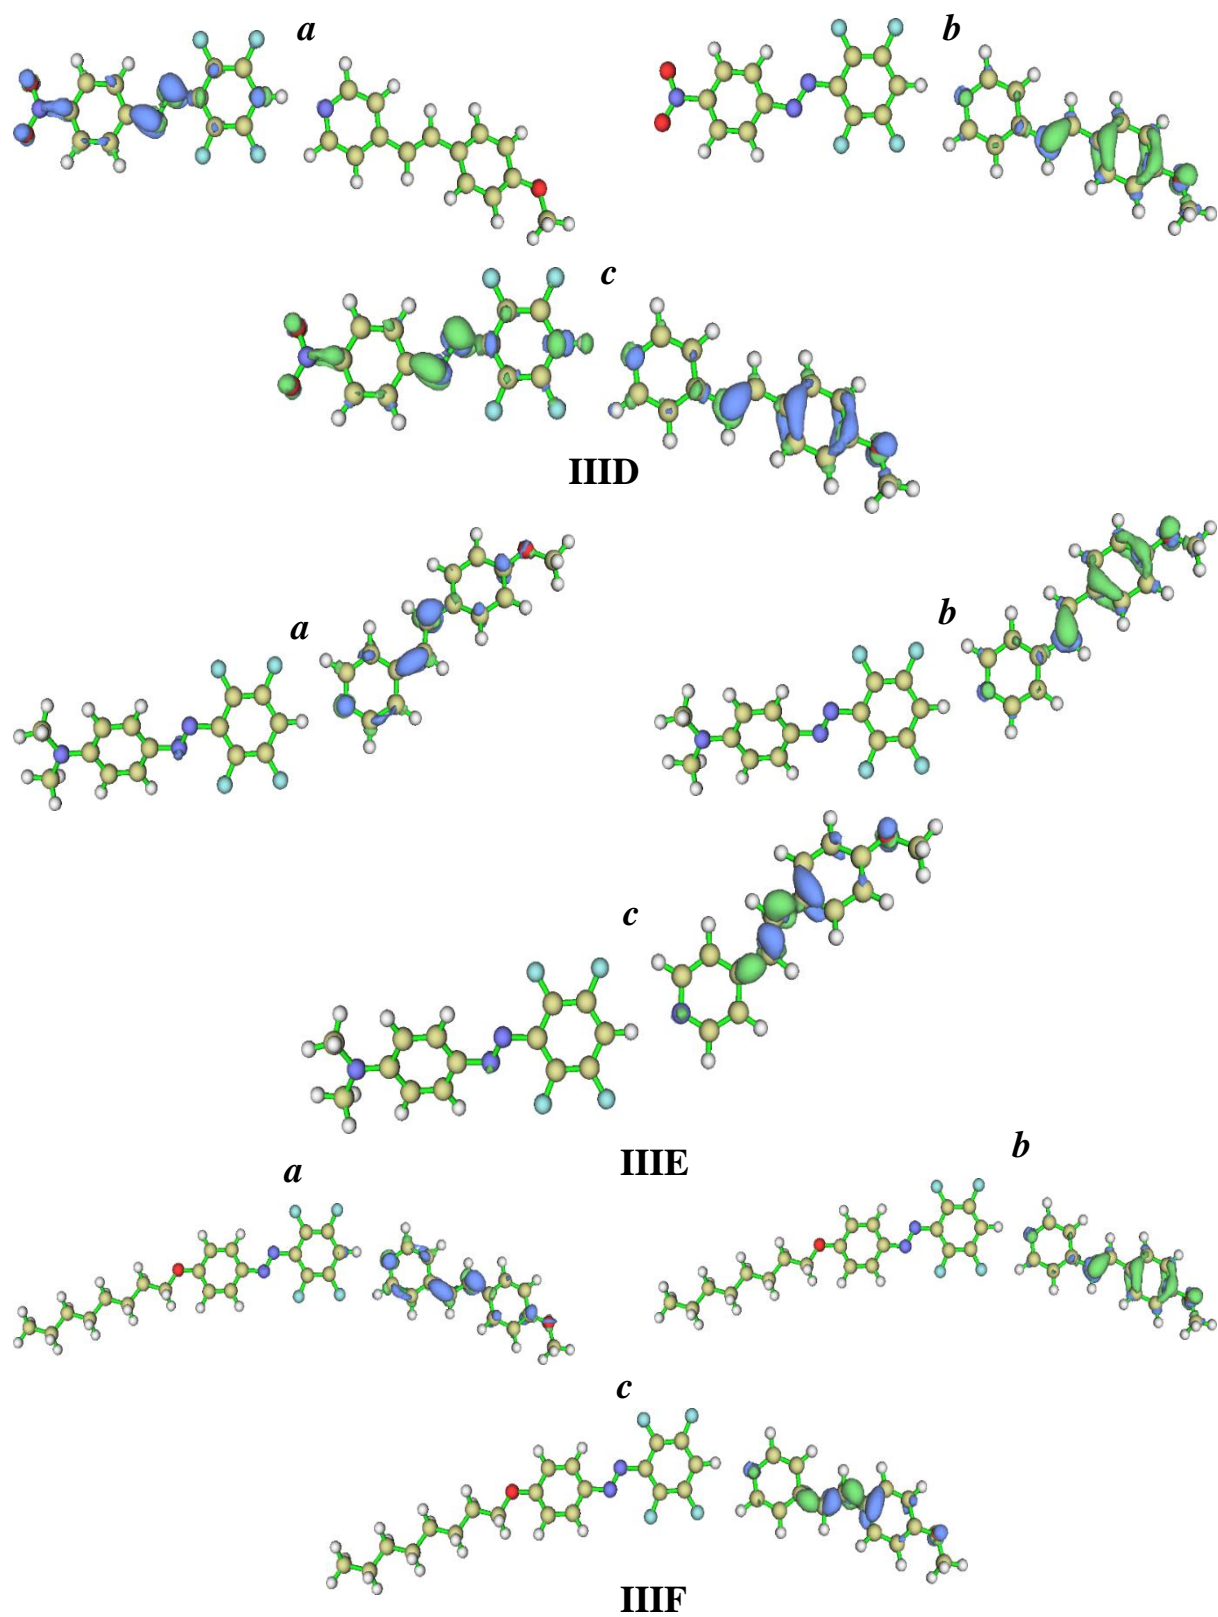

**Fig. S5:** a) & b)  $f^+$  &  $f^-$  Fukui functions of **IIIA-IIIH** and **IIIA-IIIH** complexes, respectively  
 c) Dual descriptor ( $\Delta f$ ) of **IIIA-IIIH** and **IIIA-IIIH** complexes

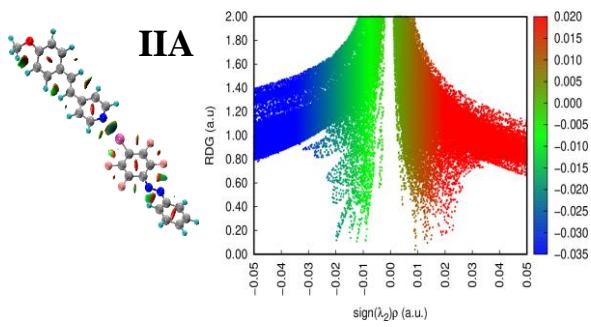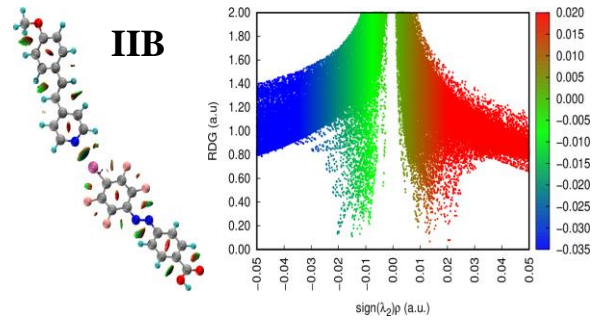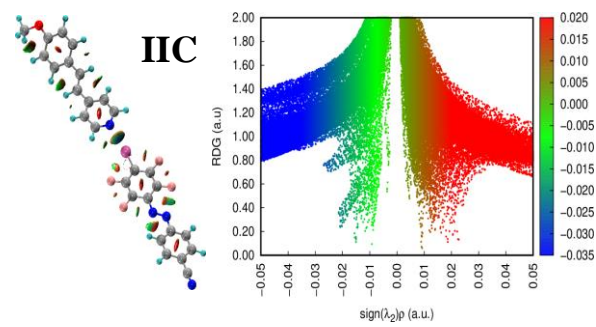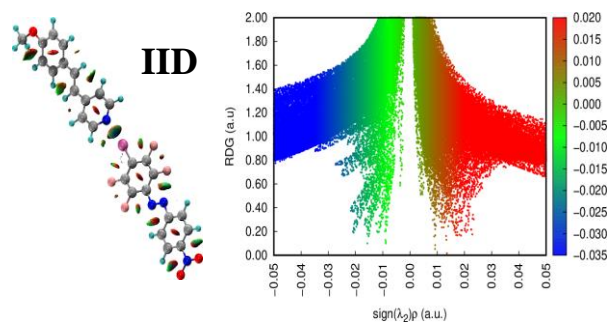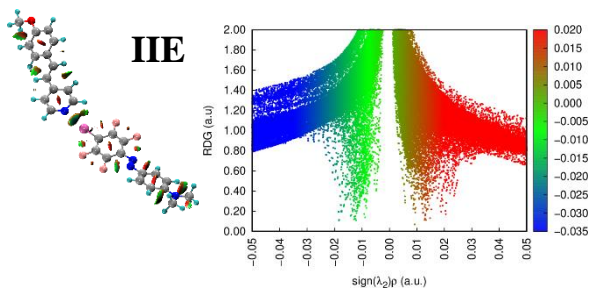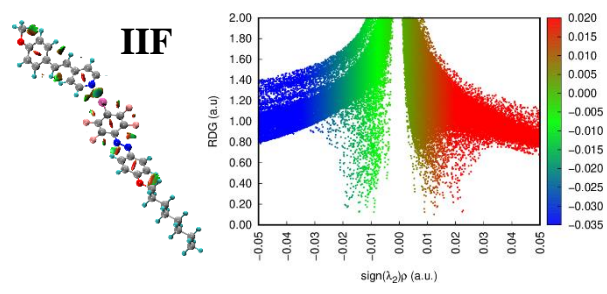

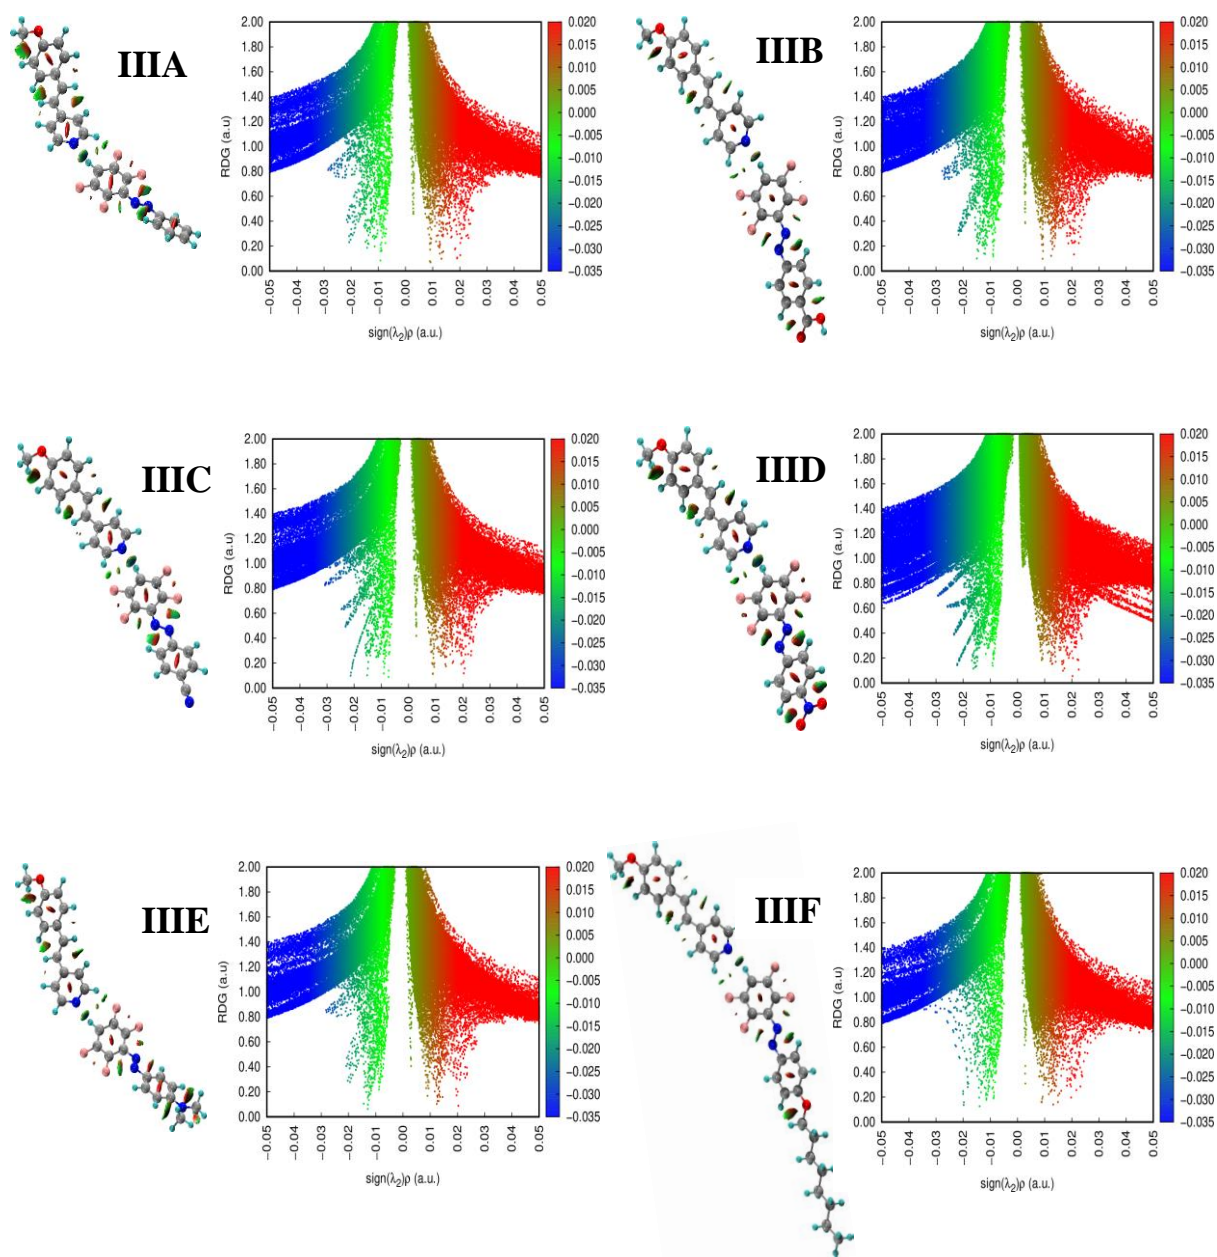

**Fig. S6:** 3D isosurfaces and 2D-RDG graphs of **IIA-IIIF** and **IIIA-IIIF** complexes

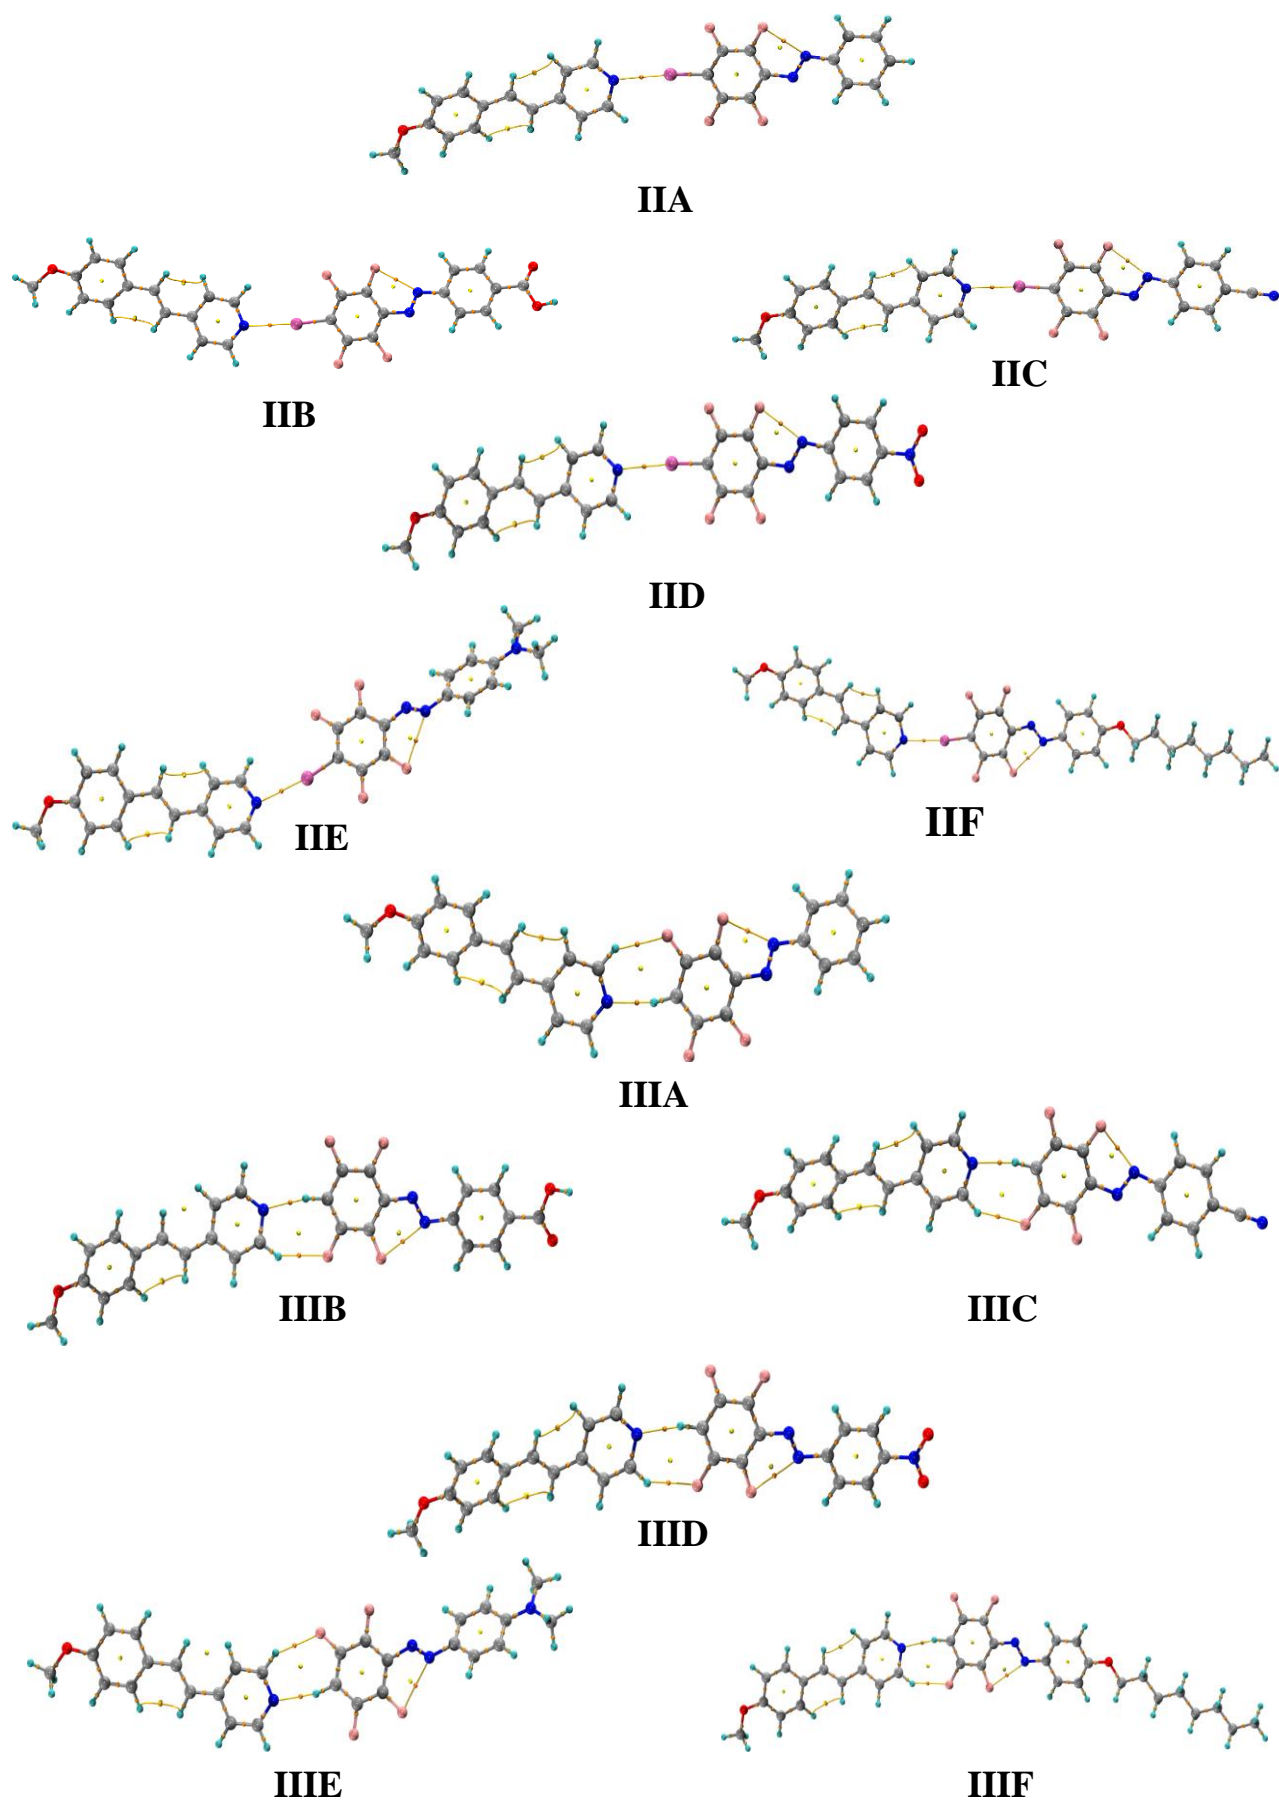

**Fig. S7:** Topological figures of **II A-II F** and **III A-III F** complexes (orange dots represent BCPs)



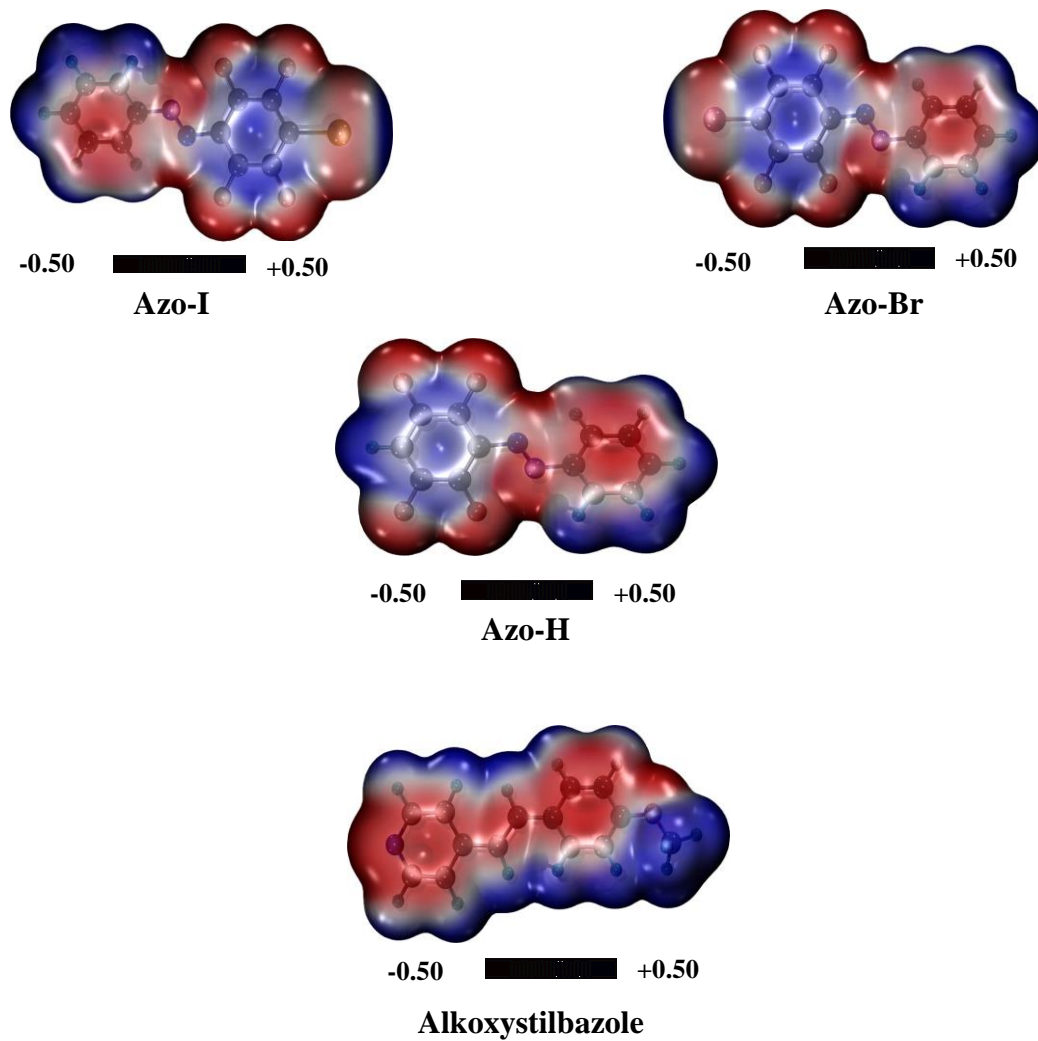

**Fig. S8 (a):** Molecular electrostatic potential plots for Azo-X (where X=I, Br and H) and alkoxy stilbazole molecule

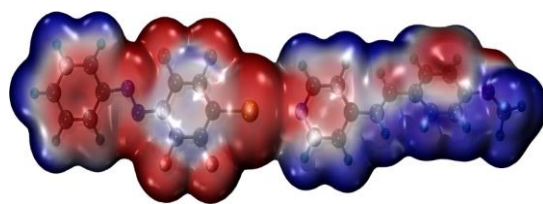

-0.50  +0.50

**IA**

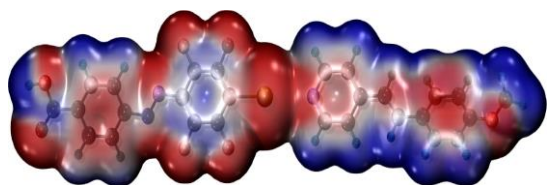

-0.50  +0.50

**IB**

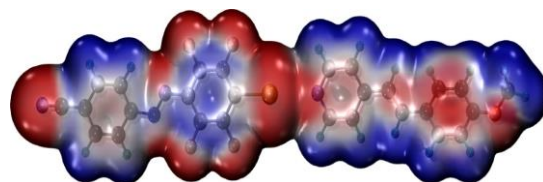

-0.50  +0.50

**IC**

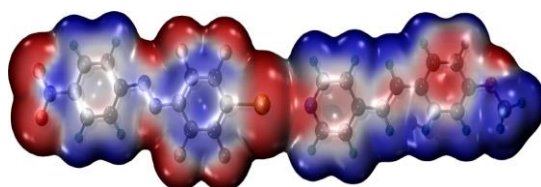

-0.50  +0.50

**ID**

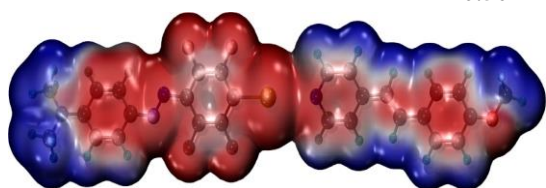

-0.50  +0.50

**IE**

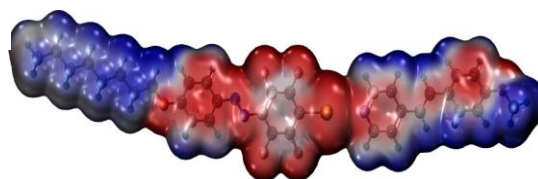

-0.50  +0.50

**IF**

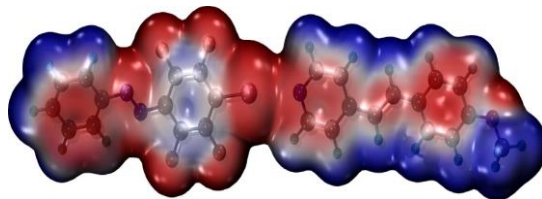

-0.50  +0.50

**IIA**

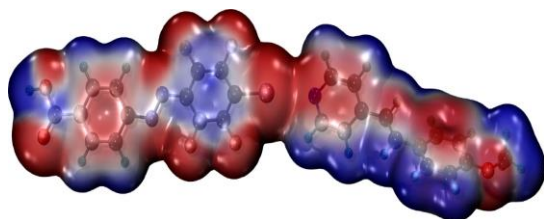

-0.50  +0.50

**IIB**

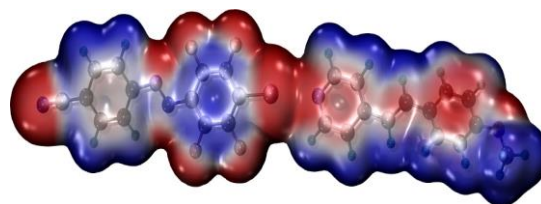

-0.50  +0.50

**IIC**

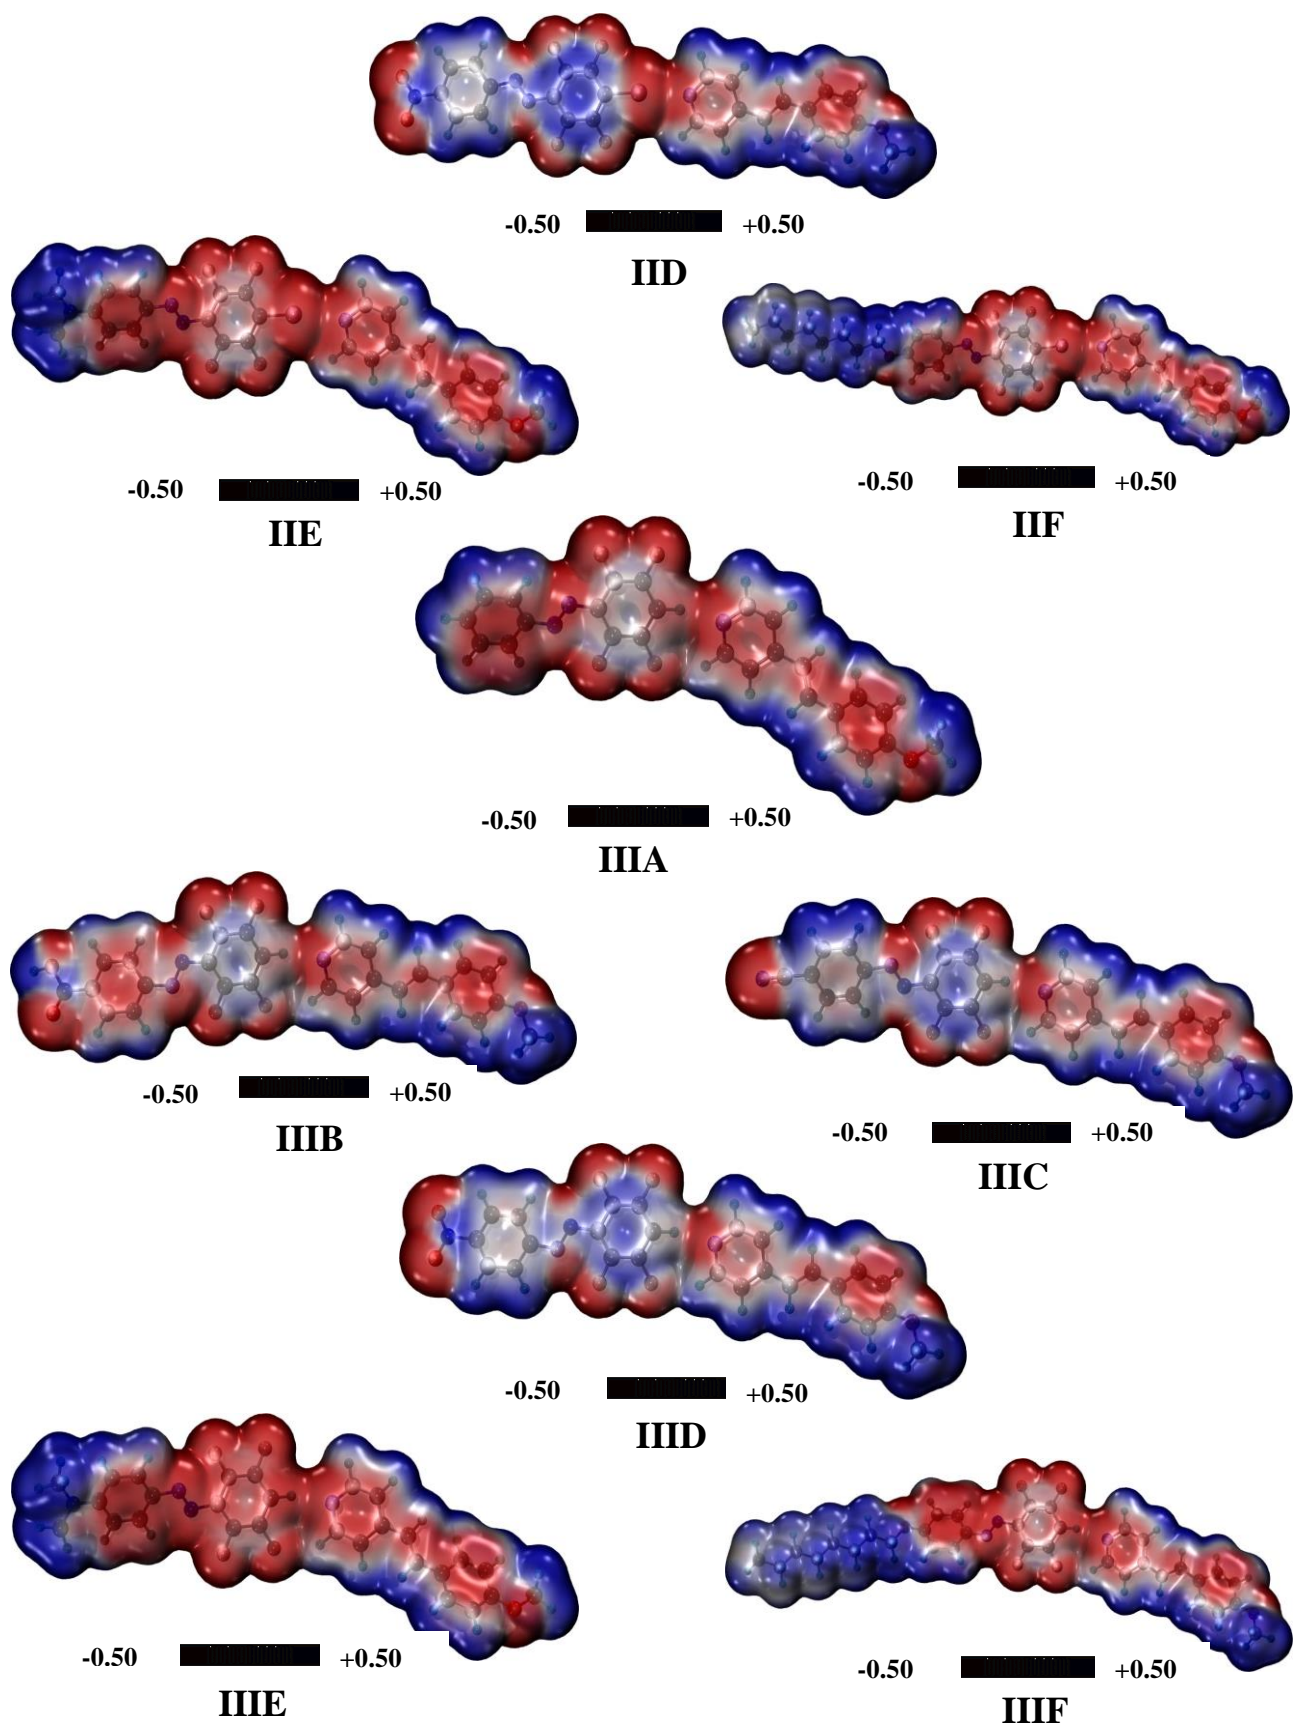

Fig. S8 (b): Molecular electrostatic potential plots for IA-IF, IIA-IIIF and IIIA-IIIH complexes

## Tables

**Table S1:** First frequencies  $\nu_1$  ( $cm^{-1}$ ), Halogen/Hydrogen bond lengths ( $\text{\AA}$ ) and interaction energies ( $kcal/mol$ ) of *cis* Azo-X complexes

| Complexes   | $\nu_1$ | X <sub>I-N</sub> | E <sub>int</sub> |
|-------------|---------|------------------|------------------|
| <b>iA</b>   | 4.76    | 2.92             | -1.7             |
| <b>iB</b>   | 3.45    | 2.91             | -1.9             |
| <b>iC</b>   | 1.86    | 2.90             | -2.3             |
| <b>iD</b>   | 3.61    | 2.90             | -2.3             |
| <b>iiA</b>  | 3.51    | 2.85             | -7.1             |
| <b>iiD</b>  | 3.13    | 2.83             | -7.7             |
| <b>iiiA</b> | 4.27    | 2.17             | -7.1             |
| <b>iiiD</b> | 2.48    | 2.15             | -7.6             |

**Table S2:** Energy decomposition analysis of IB, IC, ID and IID complexes (units of all are in  $kcal/mol$ )

|                             | IB    | IC    | ID    | IID   |
|-----------------------------|-------|-------|-------|-------|
| <b>Pauli Repulsion</b>      | 13.41 | 13.77 | 13.91 | 10.86 |
| <b>Steric Interaction</b>   | -0.86 | -1.07 | -1.00 | -0.39 |
| <b>Orbital Interactions</b> | -6.71 | -6.94 | -7.02 | -5.36 |
| <b>Bonding Energy</b>       | -7.57 | -8.01 | -8.02 | -5.74 |

**Table S3:** Energies of frontier molecular orbitals E<sub>HOMO</sub> ( $eV$ ), E<sub>LUMO</sub> ( $eV$ ), HOMO-LUMO energy gaps G<sub>H-L</sub> ( $eV$ ), % G<sub>HL</sub> and Fermi level E<sub>FL</sub> ( $eV$ ) of all the complexes

| Complex           | E <sub>HOMO</sub> | E <sub>LUMO</sub> | G <sub>H-L</sub> | % G <sub>HL</sub> | E <sub>FL</sub> |
|-------------------|-------------------|-------------------|------------------|-------------------|-----------------|
| <b>Azobenzene</b> | -8.54             | -0.74             | 7.80             |                   |                 |
| <b>IA</b>         | -7.89             | -0.96             | 6.93             | 9.90              | -4.43           |
| <b>IB</b>         | -7.68             | -0.99             | 6.69             | 17.75             | -4.34           |
| <b>IC</b>         | -7.71             | -1.21             | 6.51             | 15.43             | -4.46           |
| <b>ID</b>         | -7.72             | -1.39             | 6.33             | 13.02             | -4.56           |

|             |       |       |      |       |       |
|-------------|-------|-------|------|-------|-------|
| <b>IE</b>   | -7.06 | -0.18 | 6.88 | 10.61 | -3.62 |
| <b>IF</b>   | -7.62 | -0.36 | 7.26 | 5.62  | -3.99 |
| <b>IIA</b>  | -7.59 | -0.64 | 6.95 | 9.73  | -4.12 |
| <b>IIB</b>  | -7.62 | -1.04 | 6.57 | 19.22 | -4.33 |
| <b>IIC</b>  | -7.66 | -1.27 | 6.39 | 17.00 | -4.46 |
| <b>IID</b>  | -7.66 | -1.45 | 6.22 | 14.56 | -4.56 |
| <b>III</b>  | -7.10 | -0.24 | 6.86 | 10.91 | -3.67 |
| <b>IIIF</b> | -7.56 | -0.42 | 7.14 | 7.25  | -3.99 |
| <b>IIIA</b> | -7.59 | -0.51 | 7.09 | 7.92  | -4.05 |
| <b>IIIB</b> | -7.63 | -0.93 | 6.70 | 17.86 | -4.28 |
| <b>IIIC</b> | -7.66 | -1.15 | 6.51 | 15.40 | -4.41 |
| <b>IIID</b> | -7.67 | -1.35 | 6.32 | 12.96 | -4.51 |
| <b>IIIE</b> | -7.05 | -0.09 | 6.96 | 9.55  | -3.57 |
| <b>IIIF</b> | -7.57 | -0.28 | 7.29 | 5.28  | -3.92 |

**Table S4:** Ionization potential  $I$  (eV), electron affinity  $A$  (eV), hardness  $\mu$  (eV), chemical potential  $\mu$  (eV), softness  $S$  (eV<sup>-1</sup>), and electrophilicity  $\omega$  (eV) of all the complexes

| <b>Complex</b>    | <b>I</b> | <b>A</b> | <b><math>\eta</math></b> | <b><math>\mu</math></b> | <b>S</b> | <b><math>\omega</math></b> |
|-------------------|----------|----------|--------------------------|-------------------------|----------|----------------------------|
| <b>Azobenzene</b> | 8.54     | 0.74     | 3.9                      | -4.64                   | 0.13     | 2.76                       |
| <b>IA</b>         | 7.89     | 0.96     | 3.46                     | -4.43                   | 0.15     | 2.83                       |
| <b>IB</b>         | 7.68     | 0.99     | 3.34                     | -4.34                   | 0.15     | 2.82                       |
| <b>IC</b>         | 7.71     | 1.21     | 3.25                     | -4.46                   | 0.15     | 3.06                       |
| <b>ID</b>         | 7.72     | 1.39     | 3.16                     | -4.56                   | 0.16     | 3.29                       |
| <b>IE</b>         | 7.06     | 0.18     | 3.44                     | -3.62                   | 0.14     | 1.90                       |
| <b>IF</b>         | 7.62     | 0.36     | 3.63                     | -3.99                   | 0.14     | 2.19                       |
| <b>IIA</b>        | 7.59     | 0.64     | 3.48                     | -4.12                   | 0.14     | 2.44                       |
| <b>IIB</b>        | 7.62     | 1.04     | 3.29                     | -4.33                   | 0.15     | 2.85                       |
| <b>IIC</b>        | 7.66     | 1.27     | 3.20                     | -4.46                   | 0.15     | 3.11                       |
| <b>IID</b>        | 7.66     | 1.45     | 3.11                     | -4.56                   | 0.16     | 3.34                       |
| <b>III</b>        | 7.10     | 0.24     | 3.43                     | -3.67                   | 0.15     | 1.96                       |
| <b>IIIF</b>       | 7.56     | 0.42     | 3.57                     | -3.99                   | 0.14     | 2.23                       |

|             |      |      |      |       |      |      |
|-------------|------|------|------|-------|------|------|
| <b>IIIA</b> | 7.59 | 0.51 | 3.54 | -4.05 | 0.14 | 2.31 |
| <b>IIIB</b> | 7.63 | 0.93 | 3.35 | -4.28 | 0.15 | 2.73 |
| <b>IIIC</b> | 7.66 | 1.15 | 3.26 | -4.41 | 0.15 | 2.99 |
| <b>IIID</b> | 7.67 | 1.35 | 3.16 | -4.51 | 0.16 | 3.22 |
| <b>IIIE</b> | 7.05 | 0.09 | 3.48 | -3.57 | 0.14 | 1.83 |
| <b>IIIF</b> | 7.57 | 0.28 | 3.65 | -3.92 | 0.14 | 2.11 |

**Table S5:** Condensed atomic charges( $q$ ), Fukui functions ( $f^-$ ) and dual descriptors ( $\Delta f$ ) of **IA-IF**, **IIA-IIIF** and **IIIA-IIIF** complexes

| Atoms       | IA     |        |            | IIA    |        |            | IIIA   |        |            |
|-------------|--------|--------|------------|--------|--------|------------|--------|--------|------------|
|             | $q$    | $f^-$  | $\Delta f$ | $q$    | $f^-$  | $\Delta f$ | $q$    | $f^-$  | $\Delta f$ |
| <b>1 N</b>  | -0.058 | -0.002 | 0.003      | -0.058 | -0.002 | 0.002      | -0.057 | -0.002 | 0.130      |
| <b>2 N</b>  | -0.050 | 0.005  | 0.007      | -0.050 | 0.005  | 0.004      | -0.050 | 0.004  | 0.133      |
| <b>3 C</b>  | 0.001  | 0.006  | 0.004      | 0.000  | 0.006  | 0.002      | 0.000  | 0.006  | 0.007      |
| <b>4 C</b>  | 0.020  | -0.001 | 0.001      | 0.019  | -0.001 | 0.000      | 0.019  | -0.002 | 0.012      |
| <b>5 C</b>  | -0.034 | 0.002  | 0.001      | -0.034 | 0.002  | 0.001      | -0.035 | 0.002  | 0.040      |
| <b>6 C</b>  | 0.086  | 0.003  | 0.002      | 0.087  | 0.002  | 0.002      | 0.084  | 0.004  | 0.032      |
| <b>7 C</b>  | 0.087  | 0.002  | 0.002      | 0.089  | 0.003  | 0.002      | 0.085  | 0.001  | 0.034      |
| <b>8 C</b>  | -0.037 | 0.001  | 0.001      | -0.037 | 0.001  | 0.001      | -0.038 | 0.002  | 0.041      |
| <b>9 C</b>  | -0.039 | 0.003  | 0.001      | -0.039 | 0.003  | 0.001      | -0.040 | 0.003  | 0.029      |
| <b>10 C</b> | 0.074  | 0.001  | 0.002      | 0.077  | 0.000  | 0.001      | 0.086  | 0.000  | 0.031      |
| <b>11 C</b> | 0.074  | 0.001  | 0.002      | 0.078  | 0.001  | 0.001      | 0.084  | -0.005 | 0.033      |
| <b>12 C</b> | -0.042 | 0.003  | 0.001      | -0.041 | 0.003  | 0.001      | -0.042 | 0.003  | 0.033      |
| <b>13 C</b> | -0.033 | 0.006  | 0.002      | -0.033 | 0.006  | 0.002      | -0.034 | 0.006  | 0.062      |
| <b>14 C</b> | -0.078 | 0.003  | 0.005      | -0.034 | -0.001 | 0.002      | -0.062 | -0.010 | 0.078      |
| <b>15 H</b> | 0.053  | 0.001  | 0.000      | 0.054  | 0.001  | 0.001      | 0.053  | 0.000  | 0.024      |
| <b>16 H</b> | 0.048  | 0.000  | 0.000      | 0.048  | 0.000  | 0.000      | 0.048  | 0.001  | 0.021      |
| <b>17 H</b> | 0.050  | 0.002  | 0.000      | 0.050  | 0.002  | 0.001      | 0.050  | 0.003  | 0.024      |
| <b>18 H</b> | 0.050  | 0.002  | 0.000      | 0.050  | 0.003  | 0.001      | 0.050  | 0.003  | 0.025      |
| <b>19 H</b> | 0.050  | 0.003  | 0.000      | 0.050  | 0.003  | 0.001      | 0.050  | 0.004  | 0.031      |
| <b>20 F</b> | -0.092 | 0.000  | 0.001      | -0.087 | 0.001  | 0.001      | -0.092 | -0.006 | 0.035      |

|                  |        |        |        |        |        |        |        |        |        |
|------------------|--------|--------|--------|--------|--------|--------|--------|--------|--------|
| <b>21 F</b>      | -0.084 | 0.004  | 0.002  | -0.083 | 0.004  | 0.002  | -0.088 | 0.003  | 0.024  |
| <b>22 F</b>      | -0.092 | 0.000  | 0.001  | -0.088 | -0.002 | 0.001  | -0.097 | 0.000  | 0.031  |
| <b>23 F</b>      | -0.085 | 0.004  | 0.002  | -0.084 | 0.004  | 0.002  | -0.088 | 0.005  | 0.022  |
| <b>24 I/Br/H</b> | 0.038  | -0.018 | -0.002 | 0.001  | -0.019 | -0.001 | 0.046  | -0.006 | 0.032  |
| <b>25 C</b>      | -0.019 | 0.064  | -0.058 | -0.019 | 0.063  | -0.054 | -0.019 | 0.064  | -0.066 |
| <b>26 C</b>      | -0.027 | 0.036  | 0.055  | -0.028 | 0.038  | 0.055  | -0.028 | 0.038  | -0.030 |
| <b>27 C</b>      | 0.018  | -0.002 | 0.052  | 0.016  | -0.001 | 0.050  | 0.016  | -0.001 | 0.008  |
| <b>28 C</b>      | -0.051 | 0.095  | -0.038 | -0.050 | 0.095  | -0.032 | -0.051 | 0.096  | -0.100 |
| <b>29 C</b>      | -0.035 | 0.047  | -0.011 | -0.036 | 0.047  | -0.010 | -0.036 | 0.047  | -0.045 |
| <b>30 C</b>      | -0.036 | 0.041  | -0.013 | -0.037 | 0.042  | -0.012 | -0.037 | 0.042  | -0.040 |
| <b>31 C</b>      | -0.070 | 0.045  | -0.023 | -0.070 | 0.044  | -0.022 | -0.071 | 0.044  | -0.041 |
| <b>32 C</b>      | -0.059 | 0.051  | -0.025 | -0.060 | 0.051  | -0.024 | -0.060 | 0.051  | -0.048 |
| <b>33 C</b>      | -0.049 | 0.031  | 0.010  | -0.051 | 0.032  | 0.010  | -0.052 | 0.032  | -0.026 |
| <b>34 C</b>      | 0.082  | 0.066  | -0.019 | 0.081  | 0.066  | -0.018 | 0.081  | 0.067  | -0.061 |
| <b>35 C</b>      | 0.025  | 0.024  | 0.028  | 0.022  | 0.025  | 0.025  | 0.023  | 0.026  | -0.027 |
| <b>36 C</b>      | 0.025  | 0.023  | 0.020  | 0.023  | 0.024  | 0.018  | 0.022  | 0.025  | -0.034 |
| <b>37 H</b>      | 0.044  | 0.023  | 0.009  | 0.044  | 0.023  | 0.009  | 0.044  | 0.023  | -0.023 |
| <b>38 H</b>      | 0.042  | 0.027  | 0.002  | 0.042  | 0.027  | 0.002  | 0.042  | 0.027  | -0.025 |
| <b>39 H</b>      | 0.046  | 0.025  | -0.009 | 0.046  | 0.025  | -0.008 | 0.046  | 0.025  | -0.024 |
| <b>40 H</b>      | 0.048  | 0.028  | -0.011 | 0.047  | 0.028  | -0.011 | 0.048  | 0.028  | -0.028 |
| <b>41 H</b>      | 0.043  | 0.027  | -0.009 | 0.043  | 0.027  | -0.009 | 0.043  | 0.027  | -0.025 |
| <b>42 H</b>      | 0.052  | 0.031  | -0.010 | 0.052  | 0.031  | -0.010 | 0.052  | 0.031  | -0.029 |
| <b>43 H</b>      | 0.051  | 0.014  | 0.011  | 0.050  | 0.015  | 0.010  | 0.049  | 0.015  | -0.009 |
| <b>44 H</b>      | 0.050  | 0.019  | 0.013  | 0.046  | 0.019  | 0.011  | 0.050  | 0.020  | -0.020 |
| <b>45 H</b>      | 0.050  | 0.018  | 0.011  | 0.051  | 0.019  | 0.010  | 0.043  | 0.018  | -0.026 |
| <b>46 N</b>      | -0.138 | 0.046  | 0.025  | -0.145 | 0.050  | 0.026  | -0.140 | 0.051  | -0.070 |
| <b>47 C</b>      | -0.047 | 0.026  | 0.018  | -0.049 | 0.026  | 0.018  | -0.049 | 0.027  | -0.025 |
| <b>48 O</b>      | -0.136 | 0.070  | -0.044 | -0.137 | 0.069  | -0.043 | -0.137 | 0.069  | -0.066 |
| <b>49 H</b>      | 0.050  | 0.011  | 0.012  | 0.049  | 0.011  | 0.011  | 0.049  | 0.012  | -0.009 |
| <b>50 C</b>      | 0.006  | 0.018  | -0.008 | 0.005  | 0.018  | -0.008 | 0.005  | 0.018  | -0.016 |
| <b>51 H</b>      | 0.040  | 0.019  | -0.009 | 0.040  | 0.019  | -0.009 | 0.040  | 0.019  | -0.018 |
| <b>52 H</b>      | 0.052  | 0.023  | -0.007 | 0.052  | 0.023  | -0.008 | 0.052  | 0.023  | -0.020 |

53 H      0.040    0.019    -0.009    0.040    0.019    -0.009    0.040    0.019    -0.018

| Atoms | IB     |        |            | IIB    |        |            | IIIB   |        |            |
|-------|--------|--------|------------|--------|--------|------------|--------|--------|------------|
|       | $q$    | $f^-$  | $\Delta f$ | $q$    | $f^-$  | $\Delta f$ | $q$    | $f^-$  | $\Delta f$ |
| 1 C   | -0.019 | 0.065  | -0.067     | -0.052 | -0.002 | 0.120      | -0.051 | -0.002 | 0.123      |
| 2 C   | -0.026 | 0.036  | -0.028     | -0.051 | 0.005  | 0.113      | -0.051 | 0.005  | 0.114      |
| 3 C   | 0.019  | -0.002 | 0.009      | -0.001 | 0.006  | 0.003      | -0.001 | 0.005  | 0.003      |
| 4 C   | -0.051 | 0.096  | -0.100     | 0.030  | -0.002 | 0.015      | 0.030  | -0.002 | 0.019      |
| 5 C   | -0.035 | 0.047  | -0.045     | -0.032 | 0.002  | 0.037      | -0.033 | 0.002  | 0.038      |
| 6 C   | -0.036 | 0.041  | -0.040     | 0.090  | 0.003  | 0.030      | 0.087  | 0.003  | 0.030      |
| 7 C   | -0.070 | 0.045  | -0.042     | 0.091  | 0.002  | 0.031      | 0.087  | 0.001  | 0.031      |
| 8 C   | -0.059 | 0.051  | -0.049     | -0.037 | 0.001  | 0.037      | -0.037 | 0.002  | 0.039      |
| 9 C   | -0.049 | 0.031  | -0.028     | -0.029 | 0.002  | 0.025      | -0.029 | 0.002  | 0.026      |
| 10 C  | 0.082  | 0.066  | -0.062     | 0.078  | 0.001  | 0.022      | 0.087  | -0.001 | 0.028      |
| 11 C  | 0.025  | 0.024  | -0.027     | 0.077  | 0.000  | 0.021      | 0.085  | -0.004 | 0.030      |
| 12 C  | 0.025  | 0.023  | -0.026     | -0.024 | 0.002  | 0.031      | -0.024 | 0.002  | 0.033      |
| 13 H  | 0.044  | 0.023  | -0.022     | -0.013 | 0.005  | 0.049      | -0.014 | 0.005  | 0.051      |
| 14 H  | 0.042  | 0.027  | -0.025     | -0.032 | -0.001 | 0.046      | -0.059 | -0.011 | 0.073      |
| 15 H  | 0.046  | 0.025  | -0.025     | 0.057  | 0.000  | 0.022      | 0.056  | 0.000  | 0.023      |
| 16 H  | 0.048  | 0.028  | -0.028     | 0.050  | 0.000  | 0.019      | 0.050  | 0.000  | 0.020      |
| 17 H  | 0.043  | 0.027  | -0.025     | 0.052  | 0.002  | 0.019      | 0.052  | 0.002  | 0.020      |
| 18 H  | 0.052  | 0.031  | -0.029     | 0.057  | 0.002  | 0.021      | 0.056  | 0.002  | 0.022      |
| 19 H  | 0.051  | 0.014  | -0.010     | -0.087 | -0.002 | 0.026      | -0.091 | -0.006 | 0.032      |
| 20 H  | 0.050  | 0.019  | -0.020     | -0.081 | 0.003  | 0.021      | -0.085 | 0.003  | 0.021      |
| 21 H  | 0.050  | 0.018  | -0.020     | -0.086 | 0.001  | 0.025      | -0.095 | 0.000  | 0.029      |
| 22 N  | -0.138 | 0.046  | -0.058     | -0.082 | 0.005  | 0.020      | -0.086 | 0.005  | 0.020      |
| 23 C  | -0.047 | 0.026  | -0.022     | 0.215  | 0.001  | 0.025      | 0.047  | -0.006 | 0.029      |
| 24 O  | -0.136 | 0.070  | -0.067     | -0.283 | 0.004  | 0.044      | 0.215  | 0.001  | 0.027      |
| 25 H  | 0.050  | 0.011  | -0.007     | -0.174 | 0.002  | 0.019      | -0.284 | 0.005  | 0.046      |
| 26 C  | 0.006  | 0.018  | -0.016     | 0.192  | 0.002  | 0.017      | -0.175 | 0.002  | 0.020      |
| 27 H  | 0.040  | 0.019  | -0.018     | 0.005  | -0.020 | 0.096      | 0.192  | 0.002  | 0.018      |
| 28 H  | 0.053  | 0.023  | -0.021     | -0.019 | 0.064  | -0.066     | -0.019 | 0.064  | -0.067     |



|                  |        |        |        |        |        |        |        |        |        |
|------------------|--------|--------|--------|--------|--------|--------|--------|--------|--------|
| <b>29 H</b>      | 0.040  | 0.019  | -0.018 | -0.028 | 0.038  | -0.031 | -0.028 | 0.037  | -0.029 |
| <b>30 N</b>      | -0.052 | -0.002 | 0.120  | 0.017  | -0.001 | 0.008  | 0.017  | -0.001 | 0.008  |
| <b>31 N</b>      | -0.051 | 0.006  | 0.113  | -0.051 | 0.095  | -0.100 | -0.050 | 0.096  | -0.101 |
| <b>32 C</b>      | 0.000  | 0.006  | 0.002  | -0.036 | 0.047  | -0.045 | -0.036 | 0.047  | -0.046 |
| <b>33 C</b>      | 0.031  | -0.002 | 0.016  | -0.037 | 0.041  | -0.040 | -0.037 | 0.042  | -0.040 |
| <b>34 C</b>      | -0.032 | 0.002  | 0.036  | -0.070 | 0.044  | -0.042 | -0.070 | 0.045  | -0.042 |
| <b>35 C</b>      | 0.088  | 0.003  | 0.029  | -0.060 | 0.051  | -0.048 | -0.060 | 0.051  | -0.048 |
| <b>36 C</b>      | 0.090  | 0.002  | 0.030  | -0.051 | 0.032  | -0.028 | -0.050 | 0.032  | -0.030 |
| <b>37 C</b>      | -0.037 | 0.001  | 0.037  | 0.082  | 0.066  | -0.062 | 0.082  | 0.067  | -0.062 |
| <b>38 C</b>      | -0.029 | 0.002  | 0.025  | 0.024  | 0.025  | -0.026 | 0.022  | 0.026  | -0.034 |
| <b>39 C</b>      | 0.074  | 0.001  | 0.021  | 0.022  | 0.024  | -0.030 | 0.022  | 0.024  | -0.026 |
| <b>40 C</b>      | 0.075  | 0.001  | 0.019  | 0.044  | 0.023  | -0.022 | 0.044  | 0.023  | -0.021 |
| <b>41 C</b>      | -0.024 | 0.002  | 0.031  | 0.042  | 0.027  | -0.025 | 0.042  | 0.027  | -0.026 |
| <b>42 C</b>      | -0.013 | 0.004  | 0.049  | 0.046  | 0.025  | -0.024 | 0.046  | 0.025  | -0.025 |
| <b>43 C</b>      | -0.076 | 0.003  | 0.037  | 0.048  | 0.028  | -0.028 | 0.047  | 0.028  | -0.027 |
| <b>44 H</b>      | 0.057  | 0.000  | 0.022  | 0.043  | 0.027  | -0.025 | 0.043  | 0.028  | -0.026 |
| <b>45 H</b>      | 0.050  | 0.000  | 0.020  | 0.052  | 0.031  | -0.029 | 0.052  | 0.031  | -0.029 |
| <b>46 H</b>      | 0.052  | 0.002  | 0.020  | 0.049  | 0.015  | -0.010 | 0.050  | 0.015  | -0.012 |
| <b>47 H</b>      | 0.056  | 0.002  | 0.021  | 0.051  | 0.020  | -0.020 | 0.044  | 0.019  | -0.026 |
| <b>48 F</b>      | -0.091 | 0.000  | 0.023  | 0.046  | 0.019  | -0.023 | 0.050  | 0.019  | -0.020 |
| <b>49 F</b>      | -0.082 | 0.004  | 0.019  | -0.144 | 0.049  | -0.064 | -0.140 | 0.050  | -0.069 |
| <b>50 F</b>      | -0.091 | 0.000  | 0.024  | -0.048 | 0.026  | -0.024 | -0.050 | 0.026  | -0.021 |
| <b>51 F</b>      | -0.083 | 0.004  | 0.019  | -0.136 | 0.069  | -0.066 | -0.136 | 0.070  | -0.066 |
| <b>52 C</b>      | 0.216  | 0.001  | 0.025  | 0.049  | 0.011  | -0.009 | 0.049  | 0.011  | -0.007 |
| <b>53 O</b>      | -0.284 | 0.004  | 0.044  | 0.005  | 0.018  | -0.016 | 0.005  | 0.018  | -0.016 |
| <b>54 O</b>      | -0.175 | 0.001  | 0.019  | 0.040  | 0.019  | -0.018 | 0.040  | 0.019  | -0.018 |
| <b>55 H</b>      | 0.192  | 0.002  | 0.017  | 0.052  | 0.023  | -0.021 | 0.052  | 0.023  | -0.021 |
| <b>56 I/Br/H</b> | 0.042  | -0.019 | 0.100  | 0.040  | 0.019  | -0.018 | 0.040  | 0.019  | -0.018 |

| Atoms      | IC     |       |            | IIC    |       |            | IIIC   |        |            |
|------------|--------|-------|------------|--------|-------|------------|--------|--------|------------|
|            | $q$    | $f^-$ | $\Delta f$ | $q$    | $f^-$ | $\Delta f$ | $q$    | $f^-$  | $\Delta f$ |
| <b>1 C</b> | -0.019 | 0.065 | -0.068     | -0.019 | 0.064 | -0.066     | -0.049 | -0.003 | 0.124      |

|             |        |        |        |        |        |        |        |        |        |
|-------------|--------|--------|--------|--------|--------|--------|--------|--------|--------|
| <b>2 C</b>  | -0.026 | 0.035  | -0.028 | -0.028 | 0.037  | -0.029 | -0.052 | 0.006  | 0.111  |
| <b>3 C</b>  | 0.019  | -0.002 | 0.009  | 0.017  | -0.001 | 0.008  | -0.001 | 0.005  | 0.003  |
| <b>4 C</b>  | -0.051 | 0.096  | -0.100 | -0.051 | 0.096  | -0.100 | 0.033  | -0.002 | 0.020  |
| <b>5 C</b>  | -0.035 | 0.047  | -0.045 | -0.036 | 0.047  | -0.045 | -0.028 | 0.002  | 0.037  |
| <b>6 C</b>  | -0.036 | 0.041  | -0.040 | -0.037 | 0.041  | -0.040 | 0.088  | 0.001  | 0.033  |
| <b>7 C</b>  | -0.070 | 0.045  | -0.043 | -0.070 | 0.045  | -0.042 | 0.090  | 0.003  | 0.031  |
| <b>8 C</b>  | -0.059 | 0.051  | -0.049 | -0.060 | 0.051  | -0.048 | -0.032 | 0.001  | 0.040  |
| <b>9 C</b>  | -0.049 | 0.031  | -0.027 | -0.050 | 0.032  | -0.029 | -0.020 | 0.002  | 0.027  |
| <b>10 C</b> | 0.083  | 0.066  | -0.062 | 0.082  | 0.066  | -0.062 | 0.086  | -0.004 | 0.032  |
| <b>11 C</b> | 0.025  | 0.024  | -0.027 | 0.022  | 0.025  | -0.030 | 0.087  | -0.001 | 0.026  |
| <b>12 C</b> | 0.025  | 0.023  | -0.026 | 0.023  | 0.024  | -0.026 | -0.021 | 0.003  | 0.033  |
| <b>13 H</b> | 0.044  | 0.023  | -0.022 | 0.044  | 0.023  | -0.022 | 0.017  | 0.005  | 0.053  |
| <b>14 H</b> | 0.042  | 0.027  | -0.025 | 0.042  | 0.027  | -0.026 | -0.056 | -0.011 | 0.074  |
| <b>15 H</b> | 0.046  | 0.025  | -0.025 | 0.046  | 0.025  | -0.025 | 0.060  | 0.001  | 0.022  |
| <b>16 H</b> | 0.048  | 0.028  | -0.028 | 0.047  | 0.028  | -0.027 | 0.053  | 0.000  | 0.021  |
| <b>17 H</b> | 0.043  | 0.028  | -0.026 | 0.043  | 0.027  | -0.026 | 0.062  | 0.002  | 0.022  |
| <b>18 H</b> | 0.052  | 0.031  | -0.029 | 0.052  | 0.031  | -0.029 | 0.062  | 0.003  | 0.023  |
| <b>19 H</b> | 0.051  | 0.014  | -0.010 | 0.050  | 0.015  | -0.011 | -0.094 | -0.001 | 0.028  |
| <b>20 H</b> | 0.050  | 0.019  | -0.020 | 0.046  | 0.019  | -0.023 | -0.083 | 0.005  | 0.021  |
| <b>21 H</b> | 0.050  | 0.018  | -0.020 | 0.051  | 0.019  | -0.020 | -0.090 | -0.005 | 0.033  |
| <b>22 N</b> | -0.138 | 0.046  | -0.058 | -0.145 | 0.049  | -0.064 | -0.085 | 0.003  | 0.022  |
| <b>23 C</b> | -0.047 | 0.025  | -0.022 | -0.049 | 0.026  | -0.022 | 0.067  | 0.001  | 0.023  |
| <b>24 O</b> | -0.136 | 0.070  | -0.067 | -0.136 | 0.069  | -0.066 | -0.211 | 0.009  | 0.076  |
| <b>25 H</b> | 0.050  | 0.011  | -0.007 | 0.049  | 0.011  | -0.007 | 0.048  | -0.006 | 0.030  |
| <b>26 C</b> | 0.006  | 0.018  | -0.017 | 0.006  | 0.018  | -0.016 | -0.019 | 0.065  | -0.067 |
| <b>27 H</b> | 0.040  | 0.019  | -0.018 | 0.040  | 0.019  | -0.018 | -0.028 | 0.037  | -0.028 |
| <b>28 H</b> | 0.053  | 0.023  | -0.021 | 0.052  | 0.023  | -0.021 | 0.017  | -0.001 | 0.008  |
| <b>29 H</b> | 0.040  | 0.019  | -0.018 | 0.040  | 0.019  | -0.018 | -0.051 | 0.096  | -0.101 |
| <b>30 N</b> | -0.050 | -0.002 | 0.121  | -0.050 | -0.002 | 0.120  | -0.036 | 0.047  | -0.046 |
| <b>31 N</b> | -0.053 | 0.006  | 0.111  | -0.052 | 0.006  | 0.111  | -0.037 | 0.042  | -0.040 |
| <b>32 C</b> | 0.000  | 0.006  | 0.001  | -0.002 | 0.006  | 0.002  | -0.070 | 0.045  | -0.042 |
| <b>33 C</b> | 0.033  | -0.002 | 0.017  | 0.032  | -0.002 | 0.016  | -0.059 | 0.051  | -0.048 |
| <b>34 C</b> | -0.028 | 0.002  | 0.036  | -0.028 | 0.002  | 0.036  | -0.050 | 0.032  | -0.030 |

|                  |        |        |       |        |        |       |        |       |        |
|------------------|--------|--------|-------|--------|--------|-------|--------|-------|--------|
| <b>35 C</b>      | 0.090  | 0.002  | 0.030 | 0.091  | 0.002  | 0.032 | 0.082  | 0.067 | -0.062 |
| <b>36 C</b>      | 0.091  | 0.002  | 0.031 | 0.093  | 0.002  | 0.032 | 0.022  | 0.026 | -0.034 |
| <b>37 C</b>      | -0.031 | 0.001  | 0.038 | -0.031 | 0.001  | 0.038 | 0.022  | 0.024 | -0.026 |
| <b>38 C</b>      | -0.020 | 0.002  | 0.025 | -0.020 | 0.002  | 0.025 | 0.044  | 0.023 | -0.021 |
| <b>39 C</b>      | 0.075  | 0.001  | 0.021 | 0.078  | 0.000  | 0.023 | 0.042  | 0.027 | -0.026 |
| <b>40 C</b>      | 0.075  | 0.001  | 0.019 | 0.079  | 0.001  | 0.020 | 0.046  | 0.025 | -0.025 |
| <b>41 C</b>      | -0.021 | 0.002  | 0.032 | -0.021 | 0.002  | 0.031 | 0.047  | 0.028 | -0.027 |
| <b>42 C</b>      | 0.017  | 0.005  | 0.051 | 0.017  | 0.005  | 0.051 | 0.043  | 0.028 | -0.026 |
| <b>43 C</b>      | -0.075 | 0.003  | 0.038 | -0.030 | -0.001 | 0.047 | 0.052  | 0.032 | -0.029 |
| <b>44 H</b>      | 0.060  | 0.001  | 0.022 | 0.060  | 0.001  | 0.021 | 0.050  | 0.015 | -0.012 |
| <b>45 H</b>      | 0.054  | 0.000  | 0.020 | 0.053  | 0.000  | 0.020 | 0.043  | 0.019 | -0.026 |
| <b>46 H</b>      | 0.062  | 0.002  | 0.021 | 0.062  | 0.002  | 0.021 | 0.050  | 0.019 | -0.020 |
| <b>47 H</b>      | 0.063  | 0.002  | 0.022 | 0.063  | 0.002  | 0.022 | -0.140 | 0.050 | -0.069 |
| <b>48 F</b>      | -0.090 | 0.000  | 0.023 | -0.085 | 0.000  | 0.024 | -0.049 | 0.026 | -0.021 |
| <b>49 F</b>      | -0.081 | 0.004  | 0.020 | -0.079 | 0.004  | 0.021 | -0.136 | 0.070 | -0.066 |
| <b>50 F</b>      | -0.089 | 0.000  | 0.024 | -0.086 | -0.002 | 0.027 | 0.049  | 0.011 | -0.007 |
| <b>51 F</b>      | -0.082 | 0.004  | 0.019 | -0.081 | 0.004  | 0.021 | 0.006  | 0.018 | -0.016 |
| <b>52 C</b>      | 0.067  | 0.001  | 0.021 | 0.067  | 0.001  | 0.021 | 0.040  | 0.019 | -0.018 |
| <b>53 N</b>      | -0.211 | 0.008  | 0.073 | 0.008  | -0.020 | 0.097 | 0.052  | 0.023 | -0.021 |
| <b>54 I/Br/H</b> | 0.045  | -0.019 | 0.101 | -0.210 | 0.008  | 0.073 | 0.040  | 0.019 | -0.018 |

| Atoms      | ID     |        |            | IID    |        |            | IIID   |        |            |
|------------|--------|--------|------------|--------|--------|------------|--------|--------|------------|
|            | $q$    | $f^-$  | $\Delta f$ | $q$    | $f^-$  | $\Delta f$ | $q$    | $f^-$  | $\Delta f$ |
| <b>1 C</b> | -0.019 | 0.065  | -0.068     | -0.048 | -0.002 | 0.000      | -0.047 | -0.002 | 0.116      |
| <b>2 C</b> | -0.026 | 0.035  | -0.028     | -0.052 | 0.006  | 0.003      | -0.052 | 0.006  | 0.095      |
| <b>3 C</b> | 0.019  | -0.002 | 0.009      | -0.002 | 0.006  | 0.002      | -0.001 | 0.005  | 0.000      |
| <b>4 C</b> | -0.051 | 0.096  | -0.100     | 0.035  | -0.002 | 0.000      | 0.035  | -0.002 | 0.026      |
| <b>5 C</b> | -0.035 | 0.047  | -0.045     | -0.027 | 0.002  | 0.001      | -0.028 | 0.002  | 0.036      |
| <b>6 C</b> | -0.036 | 0.041  | -0.040     | 0.092  | 0.002  | 0.001      | 0.089  | 0.003  | 0.028      |
| <b>7 C</b> | -0.070 | 0.045  | -0.043     | 0.093  | 0.002  | 0.001      | 0.089  | 0.001  | 0.029      |
| <b>8 C</b> | -0.059 | 0.052  | -0.049     | -0.031 | 0.001  | 0.001      | -0.031 | 0.001  | 0.038      |
| <b>9 C</b> | -0.049 | 0.031  | -0.028     | -0.027 | 0.002  | 0.001      | -0.028 | 0.002  | 0.027      |

|             |        |        |        |        |        |        |        |        |        |
|-------------|--------|--------|--------|--------|--------|--------|--------|--------|--------|
| <b>10 C</b> | 0.083  | 0.066  | -0.062 | 0.078  | 0.000  | 0.001  | 0.088  | -0.001 | 0.026  |
| <b>11 C</b> | 0.025  | 0.024  | -0.027 | 0.079  | 0.001  | 0.001  | 0.086  | -0.004 | 0.028  |
| <b>12 C</b> | 0.025  | 0.023  | -0.026 | -0.028 | 0.002  | 0.001  | -0.028 | 0.002  | 0.036  |
| <b>13 H</b> | 0.044  | 0.023  | -0.022 | 0.028  | 0.004  | 0.001  | 0.028  | 0.005  | 0.044  |
| <b>14 H</b> | 0.042  | 0.027  | -0.025 | -0.030 | -0.001 | 0.002  | -0.056 | -0.011 | 0.069  |
| <b>15 H</b> | 0.046  | 0.025  | -0.025 | 0.061  | 0.001  | 0.000  | 0.061  | 0.000  | 0.023  |
| <b>16 H</b> | 0.048  | 0.028  | -0.028 | 0.054  | 0.000  | 0.000  | 0.054  | 0.000  | 0.021  |
| <b>17 H</b> | 0.043  | 0.028  | -0.026 | 0.060  | 0.002  | 0.001  | 0.060  | 0.002  | 0.020  |
| <b>18 H</b> | 0.052  | 0.031  | -0.029 | 0.061  | 0.002  | 0.001  | 0.060  | 0.002  | 0.022  |
| <b>19 H</b> | 0.051  | 0.014  | -0.010 | -0.085 | 0.000  | 0.001  | -0.090 | -0.006 | 0.030  |
| <b>20 H</b> | 0.050  | 0.019  | -0.020 | -0.079 | 0.004  | 0.002  | -0.084 | 0.003  | 0.020  |
| <b>21 H</b> | 0.050  | 0.018  | -0.020 | -0.086 | -0.002 | 0.001  | -0.093 | 0.000  | 0.027  |
| <b>22 N</b> | -0.138 | 0.046  | -0.057 | -0.080 | 0.004  | 0.002  | -0.084 | 0.005  | 0.018  |
| <b>23 C</b> | -0.047 | 0.025  | -0.022 | 0.009  | -0.020 | -0.002 | 0.048  | -0.006 | 0.028  |
| <b>24 O</b> | -0.136 | 0.070  | -0.067 | 0.257  | 0.001  | 0.001  | 0.257  | 0.001  | 0.029  |
| <b>25 H</b> | 0.050  | 0.011  | -0.007 | -0.204 | 0.005  | 0.002  | -0.203 | 0.005  | 0.064  |
| <b>26 C</b> | 0.006  | 0.018  | -0.017 | -0.203 | 0.004  | 0.002  | -0.204 | 0.005  | 0.064  |
| <b>27 H</b> | 0.040  | 0.019  | -0.018 | -0.019 | 0.064  | -0.056 | -0.019 | 0.065  | -0.067 |
| <b>28 H</b> | 0.053  | 0.023  | -0.021 | -0.028 | 0.037  | 0.058  | -0.027 | 0.036  | -0.028 |
| <b>29 H</b> | 0.040  | 0.019  | -0.018 | 0.017  | -0.001 | 0.053  | 0.017  | -0.001 | 0.008  |
| <b>30 N</b> | -0.048 | -0.002 | 0.114  | -0.051 | 0.095  | -0.034 | -0.051 | 0.096  | -0.101 |
| <b>31 N</b> | -0.053 | 0.006  | 0.097  | -0.036 | 0.047  | -0.010 | -0.035 | 0.047  | -0.046 |
| <b>32 C</b> | -0.001 | 0.006  | -0.001 | -0.037 | 0.041  | -0.013 | -0.037 | 0.042  | -0.040 |
| <b>33 C</b> | 0.036  | -0.002 | 0.022  | -0.070 | 0.045  | -0.023 | -0.070 | 0.045  | -0.043 |
| <b>34 C</b> | -0.027 | 0.002  | 0.035  | -0.059 | 0.051  | -0.025 | -0.059 | 0.052  | -0.048 |
| <b>35 C</b> | 0.091  | 0.002  | 0.028  | -0.050 | 0.032  | 0.011  | -0.050 | 0.032  | -0.030 |
| <b>36 C</b> | 0.092  | 0.002  | 0.029  | 0.082  | 0.066  | -0.019 | 0.082  | 0.067  | -0.062 |
| <b>37 C</b> | -0.031 | 0.001  | 0.036  | 0.022  | 0.025  | 0.027  | 0.022  | 0.026  | -0.033 |
| <b>38 C</b> | -0.028 | 0.002  | 0.026  | 0.023  | 0.024  | 0.020  | 0.022  | 0.024  | -0.026 |
| <b>39 C</b> | 0.075  | 0.001  | 0.020  | 0.044  | 0.023  | 0.009  | 0.044  | 0.023  | -0.021 |
| <b>40 C</b> | 0.075  | 0.001  | 0.018  | 0.042  | 0.027  | 0.002  | 0.042  | 0.027  | -0.026 |
| <b>41 C</b> | -0.028 | 0.002  | 0.034  | 0.046  | 0.025  | -0.009 | 0.046  | 0.025  | -0.025 |
| <b>42 C</b> | 0.028  | 0.004  | 0.043  | 0.047  | 0.028  | -0.011 | 0.047  | 0.028  | -0.027 |

|                  |        |        |       |        |       |        |        |       |        |
|------------------|--------|--------|-------|--------|-------|--------|--------|-------|--------|
| <b>43 C</b>      | -0.074 | 0.003  | 0.035 | 0.043  | 0.027 | -0.010 | 0.043  | 0.028 | -0.026 |
| <b>44 H</b>      | 0.061  | 0.001  | 0.022 | 0.052  | 0.031 | -0.010 | 0.052  | 0.032 | -0.029 |
| <b>45 H</b>      | 0.054  | 0.000  | 0.020 | 0.050  | 0.015 | 0.011  | 0.050  | 0.015 | -0.012 |
| <b>46 H</b>      | 0.060  | 0.002  | 0.019 | 0.046  | 0.019 | 0.012  | 0.044  | 0.019 | -0.025 |
| <b>47 H</b>      | 0.060  | 0.002  | 0.021 | 0.051  | 0.019 | 0.011  | 0.050  | 0.019 | -0.020 |
| <b>48 F</b>      | -0.089 | 0.000  | 0.022 | -0.145 | 0.049 | 0.028  | -0.140 | 0.050 | -0.067 |
| <b>49 F</b>      | -0.080 | 0.004  | 0.019 | -0.049 | 0.026 | 0.019  | -0.049 | 0.026 | -0.021 |
| <b>50 F</b>      | -0.089 | 0.000  | 0.022 | -0.136 | 0.070 | -0.044 | -0.136 | 0.070 | -0.067 |
| <b>51 F</b>      | -0.081 | 0.004  | 0.018 | 0.049  | 0.011 | 0.012  | 0.049  | 0.011 | -0.007 |
| <b>52 I/Br/H</b> | 0.047  | -0.019 | 0.097 | 0.006  | 0.018 | -0.008 | 0.006  | 0.018 | -0.016 |
| <b>53 N</b>      | 0.257  | 0.001  | 0.026 | 0.040  | 0.019 | -0.010 | 0.040  | 0.019 | -0.018 |
| <b>54 O</b>      | -0.203 | 0.004  | 0.059 | 0.052  | 0.023 | -0.008 | 0.052  | 0.023 | -0.021 |
| <b>55 O</b>      | -0.204 | 0.004  | 0.059 | 0.040  | 0.019 | -0.010 | 0.040  | 0.019 | -0.018 |

| Atoms       | IE     |       |            | IIE    |       |            | IIIE   |        |            |
|-------------|--------|-------|------------|--------|-------|------------|--------|--------|------------|
|             | $q$    | $f^-$ | $\Delta f$ | $q$    | $f^-$ | $\Delta f$ | $q$    | $f^-$  | $\Delta f$ |
| <b>1 N</b>  | -0.077 | 0.056 | -0.031     | -0.054 | 0.001 | 0.132      | -0.054 | 0.004  | 0.017      |
| <b>2 N</b>  | -0.055 | 0.001 | 0.037      | -0.077 | 0.056 | 0.055      | -0.076 | -0.005 | 0.012      |
| <b>3 C</b>  | 0.002  | 0.003 | 0.008      | -0.003 | 0.083 | -0.083     | -0.003 | -0.001 | 0.000      |
| <b>4 C</b>  | -0.002 | 0.082 | -0.083     | 0.001  | 0.003 | 0.012      | 0.001  | 0.006  | 0.004      |
| <b>5 C</b>  | -0.033 | 0.031 | -0.019     | -0.035 | 0.028 | 0.012      | -0.035 | 0.001  | 0.005      |
| <b>6 C</b>  | 0.082  | 0.018 | -0.007     | 0.085  | 0.016 | 0.017      | 0.082  | 0.003  | 0.005      |
| <b>7 C</b>  | 0.083  | 0.015 | -0.005     | -0.032 | 0.031 | 0.008      | -0.033 | 0.002  | 0.005      |
| <b>8 C</b>  | -0.035 | 0.029 | -0.017     | 0.083  | 0.018 | 0.015      | 0.080  | 0.001  | 0.005      |
| <b>9 C</b>  | -0.070 | 0.054 | -0.046     | -0.070 | 0.055 | -0.031     | -0.070 | 0.002  | 0.003      |
| <b>10 C</b> | 0.072  | 0.012 | -0.003     | 0.076  | 0.012 | 0.011      | 0.084  | -0.001 | 0.004      |
| <b>11 C</b> | 0.073  | 0.011 | -0.004     | -0.076 | 0.061 | -0.039     | -0.076 | 0.002  | 0.003      |
| <b>12 C</b> | -0.076 | 0.061 | -0.053     | 0.075  | 0.012 | 0.013      | 0.082  | -0.005 | 0.004      |
| <b>13 C</b> | 0.057  | 0.029 | -0.013     | 0.057  | 0.029 | 0.019      | 0.056  | 0.004  | 0.006      |
| <b>14 C</b> | -0.082 | 0.023 | -0.008     | -0.038 | 0.026 | 0.021      | -0.068 | -0.011 | 0.006      |
| <b>15 H</b> | 0.053  | 0.026 | -0.020     | 0.048  | 0.023 | -0.003     | 0.048  | 0.000  | 0.002      |
| <b>16 H</b> | 0.048  | 0.023 | -0.017     | 0.053  | 0.026 | -0.005     | 0.053  | 0.001  | 0.003      |

|                  |        |        |        |        |        |        |        |        |        |
|------------------|--------|--------|--------|--------|--------|--------|--------|--------|--------|
| <b>17 H</b>      | 0.039  | 0.026  | -0.020 | 0.040  | 0.026  | -0.007 | 0.039  | 0.002  | 0.002  |
| <b>18 H</b>      | 0.039  | 0.028  | -0.021 | 0.039  | 0.028  | -0.009 | 0.039  | 0.002  | 0.002  |
| <b>19 F</b>      | -0.094 | 0.015  | -0.008 | -0.087 | 0.012  | 0.012  | -0.091 | 0.005  | 0.004  |
| <b>20 F</b>      | -0.088 | 0.011  | -0.002 | -0.089 | 0.015  | 0.010  | -0.100 | 0.000  | 0.004  |
| <b>21 F</b>      | -0.094 | 0.015  | -0.008 | -0.088 | 0.014  | 0.012  | -0.092 | 0.003  | 0.004  |
| <b>22 F</b>      | -0.089 | 0.013  | -0.003 | -0.091 | 0.016  | 0.011  | -0.095 | -0.006 | 0.003  |
| <b>23 I/Br/H</b> | 0.031  | 0.062  | -0.059 | -0.002 | 0.056  | 0.022  | -0.054 | 0.004  | 0.003  |
| <b>24 N</b>      | -0.053 | 0.110  | -0.101 | -0.053 | 0.112  | -0.087 | -0.031 | 0.001  | 0.001  |
| <b>25 C</b>      | -0.031 | 0.023  | -0.020 | -0.031 | 0.024  | -0.014 | 0.037  | 0.001  | 0.002  |
| <b>26 H</b>      | 0.037  | 0.031  | -0.027 | 0.038  | 0.032  | -0.019 | 0.045  | 0.002  | 0.002  |
| <b>27 H</b>      | 0.045  | 0.025  | -0.019 | 0.045  | 0.025  | -0.009 | 0.037  | 0.001  | 0.002  |
| <b>28 H</b>      | 0.037  | 0.032  | -0.027 | 0.037  | 0.032  | -0.020 | -0.031 | 0.001  | 0.001  |
| <b>29 C</b>      | -0.031 | 0.023  | -0.020 | -0.031 | 0.023  | -0.013 | 0.037  | 0.002  | 0.002  |
| <b>30 H</b>      | 0.037  | 0.032  | -0.027 | 0.037  | 0.032  | -0.019 | 0.045  | 0.002  | 0.002  |
| <b>31 H</b>      | 0.045  | 0.025  | -0.019 | 0.045  | 0.025  | -0.010 | 0.037  | 0.001  | 0.002  |
| <b>32 H</b>      | 0.037  | 0.031  | -0.027 | 0.037  | 0.032  | -0.019 | 0.045  | -0.007 | 0.004  |
| <b>33 C</b>      | -0.019 | -0.002 | 0.007  | -0.019 | -0.002 | -0.001 | -0.019 | 0.063  | -0.054 |
| <b>34 C</b>      | -0.027 | 0.005  | 0.067  | -0.029 | 0.005  | 0.002  | -0.029 | 0.039  | 0.046  |
| <b>35 C</b>      | 0.018  | 0.005  | 0.036  | 0.016  | 0.005  | 0.002  | 0.016  | 0.000  | 0.045  |
| <b>36 C</b>      | -0.050 | -0.003 | 0.047  | -0.050 | -0.003 | -0.001 | -0.050 | 0.095  | -0.039 |
| <b>37 C</b>      | -0.035 | 0.001  | 0.027  | -0.036 | 0.001  | 0.000  | -0.036 | 0.047  | -0.013 |
| <b>38 C</b>      | -0.037 | 0.001  | 0.021  | -0.037 | 0.001  | 0.000  | -0.037 | 0.042  | -0.015 |
| <b>39 C</b>      | -0.070 | 0.002  | 0.015  | -0.071 | 0.002  | 0.001  | -0.071 | 0.044  | -0.024 |
| <b>40 C</b>      | -0.060 | 0.002  | 0.018  | -0.060 | 0.002  | 0.001  | -0.060 | 0.050  | -0.026 |
| <b>41 C</b>      | -0.050 | 0.003  | 0.030  | -0.052 | 0.003  | 0.001  | -0.052 | 0.032  | 0.005  |
| <b>42 C</b>      | 0.082  | 0.004  | 0.033  | 0.081  | 0.004  | 0.001  | 0.081  | 0.066  | -0.022 |
| <b>43 C</b>      | 0.025  | -0.002 | 0.041  | 0.023  | -0.001 | 0.000  | 0.022  | 0.026  | 0.020  |
| <b>44 C</b>      | 0.025  | -0.002 | 0.034  | 0.021  | -0.005 | -0.002 | 0.023  | 0.025  | 0.013  |
| <b>45 H</b>      | 0.044  | 0.001  | 0.023  | 0.044  | 0.000  | 0.000  | 0.044  | 0.023  | 0.005  |
| <b>46 H</b>      | 0.042  | 0.001  | 0.021  | 0.041  | 0.001  | 0.000  | 0.041  | 0.027  | -0.001 |
| <b>47 H</b>      | 0.046  | 0.000  | 0.012  | 0.046  | 0.000  | 0.000  | 0.046  | 0.025  | -0.010 |
| <b>48 H</b>      | 0.048  | 0.000  | 0.013  | 0.047  | 0.000  | 0.000  | 0.048  | 0.028  | -0.012 |
| <b>49 H</b>      | 0.043  | 0.002  | 0.012  | 0.042  | 0.002  | 0.000  | 0.042  | 0.027  | -0.011 |

|             |        |        |       |        |        |        |        |       |        |
|-------------|--------|--------|-------|--------|--------|--------|--------|-------|--------|
| <b>50 H</b> | 0.052  | 0.002  | 0.015 | 0.052  | 0.002  | 0.001  | 0.052  | 0.031 | -0.011 |
| <b>51 H</b> | 0.050  | 0.003  | 0.017 | 0.049  | 0.004  | 0.001  | 0.049  | 0.015 | 0.008  |
| <b>52 H</b> | 0.050  | -0.001 | 0.024 | 0.051  | 0.000  | 0.000  | 0.050  | 0.020 | 0.009  |
| <b>53 H</b> | 0.050  | -0.001 | 0.023 | 0.044  | -0.004 | -0.001 | 0.043  | 0.018 | 0.006  |
| <b>54 N</b> | -0.138 | -0.008 | 0.062 | -0.146 | -0.010 | -0.005 | -0.140 | 0.052 | 0.018  |
| <b>55 C</b> | -0.048 | 0.002  | 0.032 | -0.049 | 0.001  | 0.001  | -0.049 | 0.027 | 0.013  |
| <b>56 O</b> | -0.136 | 0.003  | 0.017 | -0.137 | 0.003  | 0.001  | -0.137 | 0.068 | -0.045 |
| <b>57 H</b> | 0.050  | 0.003  | 0.015 | 0.049  | 0.002  | 0.001  | 0.049  | 0.012 | 0.009  |
| <b>58 C</b> | 0.006  | 0.001  | 0.007 | 0.005  | 0.001  | 0.000  | 0.005  | 0.018 | -0.008 |
| <b>59 H</b> | 0.040  | 0.001  | 0.006 | 0.040  | 0.001  | 0.000  | 0.040  | 0.019 | -0.010 |
| <b>60 H</b> | 0.052  | 0.002  | 0.010 | 0.052  | 0.002  | 0.001  | 0.052  | 0.023 | -0.009 |
| <b>61 H</b> | 0.040  | 0.001  | 0.007 | 0.040  | 0.001  | 0.000  | 0.040  | 0.019 | -0.010 |

| Atoms       | IF     |        |            | IIF    |        |            | IIIF   |       |            |
|-------------|--------|--------|------------|--------|--------|------------|--------|-------|------------|
|             | $q$    | $f^-$  | $\Delta f$ | $q$    | $f^-$  | $\Delta f$ | $q$    | $f^-$ | $\Delta f$ |
| <b>1 N</b>  | -0.068 | -0.003 | 0.014      | -0.068 | -0.003 | 0.121      | -0.019 | 0.063 | -0.055     |
| <b>2 N</b>  | -0.052 | 0.004  | 0.018      | -0.052 | 0.004  | 0.131      | -0.029 | 0.039 | 0.053      |
| <b>3 C</b>  | 0.001  | 0.006  | 0.003      | 0.000  | 0.006  | 0.008      | 0.016  | 0.000 | 0.046      |
| <b>4 C</b>  | 0.005  | -0.001 | 0.000      | 0.005  | -0.001 | 0.005      | -0.050 | 0.095 | -0.034     |
| <b>5 C</b>  | -0.030 | 0.002  | 0.006      | -0.030 | 0.002  | 0.040      | -0.036 | 0.047 | -0.009     |
| <b>6 C</b>  | 0.084  | 0.003  | 0.005      | 0.085  | 0.002  | 0.032      | -0.037 | 0.042 | -0.012     |
| <b>7 C</b>  | 0.085  | 0.002  | 0.005      | 0.086  | 0.003  | 0.031      | -0.071 | 0.044 | -0.021     |
| <b>8 C</b>  | -0.033 | 0.001  | 0.005      | -0.033 | 0.001  | 0.036      | -0.060 | 0.051 | -0.023     |
| <b>9 C</b>  | -0.056 | 0.003  | 0.004      | -0.056 | 0.002  | 0.025      | -0.051 | 0.033 | 0.009      |
| <b>10 C</b> | 0.073  | 0.001  | 0.004      | 0.076  | 0.000  | 0.026      | 0.081  | 0.066 | -0.017     |
| <b>11 C</b> | 0.073  | 0.001  | 0.004      | 0.077  | 0.001  | 0.022      | 0.023  | 0.026 | 0.027      |
| <b>12 C</b> | -0.072 | 0.002  | 0.003      | -0.072 | 0.002  | 0.023      | 0.022  | 0.025 | 0.019      |
| <b>13 C</b> | 0.089  | 0.004  | 0.007      | 0.089  | 0.004  | 0.049      | 0.043  | 0.023 | 0.010      |
| <b>14 C</b> | -0.080 | 0.003  | 0.008      | -0.036 | -0.001 | 0.049      | 0.042  | 0.027 | 0.004      |
| <b>15 H</b> | 0.054  | 0.001  | 0.003      | 0.055  | 0.001  | 0.021      | 0.046  | 0.025 | -0.007     |
| <b>16 H</b> | 0.050  | 0.000  | 0.002      | 0.050  | 0.000  | 0.019      | 0.047  | 0.028 | -0.009     |
| <b>17 H</b> | 0.052  | 0.002  | 0.003      | 0.053  | 0.002  | 0.021      | 0.043  | 0.027 | -0.008     |

|                  |        |        |       |        |        |       |        |        |        |
|------------------|--------|--------|-------|--------|--------|-------|--------|--------|--------|
| <b>18 H</b>      | 0.044  | 0.002  | 0.003 | 0.044  | 0.002  | 0.019 | 0.052  | 0.031  | -0.008 |
| <b>19 F</b>      | -0.093 | 0.000  | 0.004 | -0.088 | 0.001  | 0.025 | 0.050  | 0.015  | 0.012  |
| <b>20 F</b>      | -0.086 | 0.004  | 0.004 | -0.085 | 0.004  | 0.020 | 0.044  | 0.019  | 0.013  |
| <b>21 F</b>      | -0.093 | 0.000  | 0.004 | -0.090 | -0.003 | 0.030 | 0.050  | 0.020  | 0.012  |
| <b>22 F</b>      | -0.087 | 0.004  | 0.004 | -0.086 | 0.003  | 0.023 | -0.140 | 0.051  | 0.030  |
| <b>23 O</b>      | -0.128 | 0.003  | 0.004 | -0.128 | 0.003  | 0.024 | -0.050 | 0.026  | 0.017  |
| <b>24 C</b>      | 0.035  | 0.000  | 0.001 | 0.035  | 0.000  | 0.005 | -0.137 | 0.069  | -0.043 |
| <b>25 H</b>      | 0.034  | 0.001  | 0.001 | 0.034  | 0.001  | 0.007 | 0.048  | 0.012  | 0.012  |
| <b>26 H</b>      | 0.034  | 0.001  | 0.001 | 0.034  | 0.001  | 0.007 | 0.005  | 0.018  | -0.007 |
| <b>27 C</b>      | -0.053 | 0.000  | 0.000 | -0.053 | 0.000  | 0.002 | 0.040  | 0.019  | -0.009 |
| <b>28 H</b>      | 0.036  | 0.000  | 0.001 | 0.036  | 0.000  | 0.004 | 0.052  | 0.023  | -0.007 |
| <b>29 H</b>      | 0.036  | 0.001  | 0.001 | 0.036  | 0.000  | 0.004 | 0.040  | 0.019  | -0.009 |
| <b>30 C</b>      | -0.050 | 0.000  | 0.000 | -0.049 | 0.000  | 0.001 | -0.067 | -0.003 | 0.004  |
| <b>31 H</b>      | 0.028  | 0.000  | 0.000 | 0.028  | 0.000  | 0.002 | -0.053 | 0.004  | 0.007  |
| <b>32 H</b>      | 0.028  | 0.000  | 0.000 | 0.028  | 0.000  | 0.002 | 0.000  | 0.006  | 0.004  |
| <b>33 C</b>      | -0.050 | 0.000  | 0.000 | -0.050 | 0.000  | 0.001 | 0.005  | -0.002 | 0.001  |
| <b>34 H</b>      | 0.029  | 0.000  | 0.000 | 0.029  | 0.000  | 0.002 | -0.031 | 0.002  | 0.001  |
| <b>35 H</b>      | 0.029  | 0.000  | 0.000 | 0.029  | 0.000  | 0.002 | 0.082  | 0.003  | 0.002  |
| <b>36 C</b>      | -0.052 | 0.000  | 0.000 | -0.052 | 0.000  | 0.001 | 0.083  | 0.001  | 0.002  |
| <b>37 H</b>      | 0.027  | 0.000  | 0.000 | 0.027  | 0.000  | 0.001 | -0.033 | 0.001  | 0.001  |
| <b>38 H</b>      | 0.027  | 0.000  | 0.000 | 0.027  | 0.000  | 0.001 | -0.057 | 0.003  | 0.000  |
| <b>39 C</b>      | -0.052 | 0.000  | 0.000 | -0.052 | 0.000  | 0.001 | 0.085  | -0.001 | 0.000  |
| <b>40 H</b>      | 0.027  | 0.000  | 0.000 | 0.027  | 0.000  | 0.001 | 0.083  | -0.004 | -0.002 |
| <b>41 H</b>      | 0.027  | 0.000  | 0.000 | 0.027  | 0.000  | 0.001 | -0.073 | 0.002  | 0.000  |
| <b>42 C</b>      | -0.051 | 0.000  | 0.000 | -0.051 | 0.000  | 0.001 | 0.088  | 0.005  | 0.001  |
| <b>43 H</b>      | 0.027  | 0.000  | 0.000 | 0.027  | 0.000  | 0.001 | -0.065 | -0.011 | -0.004 |
| <b>44 H</b>      | 0.027  | 0.000  | 0.000 | 0.027  | 0.000  | 0.001 | 0.054  | 0.000  | -0.001 |
| <b>45 C</b>      | -0.092 | 0.000  | 0.000 | -0.092 | 0.000  | 0.001 | 0.050  | 0.000  | -0.001 |
| <b>46 H</b>      | 0.030  | 0.000  | 0.000 | 0.030  | 0.000  | 0.001 | 0.052  | 0.003  | 0.000  |
| <b>47 H</b>      | 0.032  | 0.001  | 0.000 | 0.032  | 0.001  | 0.002 | 0.043  | 0.002  | 0.000  |
| <b>48 H</b>      | 0.030  | 0.000  | 0.000 | 0.030  | 0.000  | 0.001 | -0.094 | -0.006 | -0.003 |
| <b>49 I/Br/H</b> | 0.034  | -0.018 | 0.009 | 0.000  | -0.019 | 0.099 | -0.090 | 0.003  | 0.001  |



|             |        |        |        |        |        |        |        |        |        |
|-------------|--------|--------|--------|--------|--------|--------|--------|--------|--------|
| <b>50 C</b> | -0.019 | 0.064  | -0.057 | -0.019 | 0.063  | -0.065 | -0.098 | 0.000  | -0.001 |
| <b>51 C</b> | -0.027 | 0.037  | 0.047  | -0.029 | 0.039  | -0.032 | -0.090 | 0.005  | 0.001  |
| <b>52 C</b> | 0.018  | -0.002 | 0.048  | 0.016  | -0.001 | 0.007  | 0.046  | -0.007 | 0.000  |
| <b>53 C</b> | -0.051 | 0.095  | -0.043 | -0.050 | 0.095  | -0.099 | -0.128 | 0.003  | 0.000  |
| <b>54 C</b> | -0.035 | 0.047  | -0.014 | -0.036 | 0.047  | -0.045 | 0.035  | 0.000  | 0.000  |
| <b>55 C</b> | -0.036 | 0.041  | -0.016 | -0.037 | 0.042  | -0.040 | 0.034  | 0.001  | 0.000  |
| <b>56 C</b> | -0.070 | 0.044  | -0.025 | -0.071 | 0.044  | -0.041 | 0.034  | 0.001  | 0.000  |
| <b>57 C</b> | -0.059 | 0.051  | -0.028 | -0.060 | 0.050  | -0.048 | -0.053 | 0.000  | 0.000  |
| <b>58 C</b> | -0.050 | 0.031  | 0.006  | -0.052 | 0.032  | -0.027 | 0.036  | 0.001  | 0.000  |
| <b>59 C</b> | 0.082  | 0.066  | -0.024 | 0.081  | 0.066  | -0.061 | 0.036  | 0.001  | 0.000  |
| <b>60 C</b> | 0.025  | 0.024  | 0.021  | 0.023  | 0.025  | -0.026 | -0.049 | 0.000  | 0.000  |
| <b>61 C</b> | 0.025  | 0.023  | 0.015  | 0.021  | 0.024  | -0.030 | 0.028  | 0.000  | 0.000  |
| <b>62 H</b> | 0.044  | 0.023  | 0.005  | 0.044  | 0.023  | -0.023 | 0.028  | 0.000  | 0.000  |
| <b>63 H</b> | 0.042  | 0.027  | -0.001 | 0.042  | 0.027  | -0.025 | -0.050 | 0.000  | 0.000  |
| <b>64 H</b> | 0.046  | 0.025  | -0.011 | 0.046  | 0.025  | -0.024 | 0.029  | 0.000  | 0.000  |
| <b>65 H</b> | 0.048  | 0.028  | -0.013 | 0.048  | 0.028  | -0.028 | 0.029  | 0.000  | 0.000  |
| <b>66 H</b> | 0.043  | 0.027  | -0.012 | 0.042  | 0.027  | -0.025 | -0.052 | 0.000  | 0.000  |
| <b>67 H</b> | 0.052  | 0.031  | -0.012 | 0.052  | 0.031  | -0.029 | 0.027  | 0.000  | 0.000  |
| <b>68 H</b> | 0.050  | 0.015  | 0.008  | 0.049  | 0.015  | -0.010 | 0.027  | 0.000  | 0.000  |
| <b>69 H</b> | 0.050  | 0.019  | 0.008  | 0.051  | 0.020  | -0.020 | -0.052 | 0.000  | 0.000  |
| <b>70 H</b> | 0.050  | 0.018  | 0.007  | 0.045  | 0.019  | -0.024 | 0.027  | 0.000  | 0.000  |
| <b>71 N</b> | -0.138 | 0.047  | 0.017  | -0.146 | 0.050  | -0.065 | 0.027  | 0.000  | 0.000  |
| <b>72 C</b> | -0.048 | 0.026  | 0.014  | -0.049 | 0.027  | -0.024 | -0.051 | 0.000  | 0.000  |
| <b>73 O</b> | -0.136 | 0.069  | -0.046 | -0.137 | 0.068  | -0.065 | 0.027  | 0.000  | 0.000  |
| <b>74 H</b> | 0.050  | 0.011  | 0.010  | 0.049  | 0.012  | -0.009 | 0.027  | 0.000  | 0.000  |
| <b>75 C</b> | 0.006  | 0.018  | -0.009 | 0.005  | 0.017  | -0.016 | -0.092 | 0.000  | 0.000  |
| <b>76 H</b> | 0.040  | 0.019  | -0.011 | 0.040  | 0.019  | -0.018 | 0.030  | 0.000  | 0.000  |
| <b>77 H</b> | 0.052  | 0.023  | -0.009 | 0.052  | 0.023  | -0.021 | 0.032  | 0.001  | 0.000  |
| <b>78 H</b> | 0.040  | 0.019  | -0.011 | 0.040  | 0.019  | -0.018 | 0.030  | 0.000  | 0.000  |

**Table S6:** NBO charges  $Q$  ( $/e$ ), Donor (i)-acceptor (j) NBO transitions, stabilization energies  $E^{(2)}$ ,  $E(j)-E(i)$  energy differences and their Fock matrix element  $F$  (i,j)

| <b>Complex</b> | <b>Q</b> | <b>Donor NBO<br/>(i)</b> | <b>Acceptor NBO<br/>(j)</b>              | <b>E<sup>(2)</sup><br/>kcal/mol</b>     | <b>E(j)-E(i)<br/>(au)</b> | <b>F (i,j)<br/>(au)</b> |
|----------------|----------|--------------------------|------------------------------------------|-----------------------------------------|---------------------------|-------------------------|
| <b>IA</b>      | 0.043    | CR (1) C <sub>50</sub>   | BD* (2)C <sub>7</sub> -C <sub>11</sub>   | 163.01                                  | 10.24                     | 1.292                   |
|                |          |                          | BD* (2)C <sub>7</sub> -C <sub>11</sub>   | 138.47                                  | 0.06                      | 0.181                   |
| <b>IB</b>      | 0.046    | LP (1) N <sub>22</sub>   | BD* (1)C <sub>43</sub> -I <sub>56</sub>  | 12.05                                   | 0.58                      | 0.076                   |
|                |          |                          | BD (1)C <sub>43</sub> -I <sub>56</sub>   | RY* (1)N <sub>22</sub>                  | 0.29                      | 1.69                    |
| <b>IC</b>      | 0.048    | LP (1)N <sub>22</sub>    | BD*(1)C <sub>43</sub> -I <sub>54</sub>   | 12.41                                   | 0.58                      | 0.077                   |
|                |          |                          | BD (1)C <sub>43</sub> -I <sub>54</sub>   | RY*(1)N <sub>22</sub>                   | 0.29                      | 1.69                    |
| <b>ID</b>      | 0.047    | LP (1)N <sub>22</sub>    | BD*(1)C <sub>43</sub> -I <sub>52</sub>   | 12.54                                   | 0.58                      | 0.077                   |
|                |          |                          | BD (1)C <sub>43</sub> -I <sub>52</sub>   | RY*(1)N <sub>22</sub>                   | 0.29                      | 1.69                    |
| <b>IE</b>      | 0.065    | LP (1)N <sub>54</sub>    | BD*(1)C <sub>14</sub> -I <sub>23</sub>   | 10.95                                   | 0.59                      | 0.072                   |
|                |          |                          | BD (1)C <sub>14</sub> -I <sub>23</sub>   | RY*(1)N <sub>54</sub>                   | 0.29                      | 1.68                    |
| <b>IF</b>      | 0.066    | LP (1)N <sub>71</sub>    | BD*(1)C <sub>14</sub> -I <sub>49</sub>   | 11.28                                   | 0.59                      | 0.073                   |
|                |          |                          | BD (1)C <sub>14</sub> -I <sub>49</sub>   | RY*(1)N <sub>71</sub>                   | 0.29                      | 1.68                    |
| <b>IIA</b>     | 0.028    | LP (1) N <sub>46</sub>   | BD* (1)C <sub>14</sub> -Br <sub>24</sub> | 7.12                                    | 0.61                      | 0.060                   |
|                |          |                          | BD (1)C <sub>14</sub> -Br <sub>24</sub>  | RY* (1) N <sub>46</sub>                 | 1.13                      | 1.85                    |
| <b>IIB</b>     | 0.030    | LP (1)N <sub>49</sub>    | BD*(1)C <sub>14</sub> -Br <sub>27</sub>  | 7.54                                    | 0.61                      | 0.061                   |
|                |          |                          | BD (1)C <sub>14</sub> -Br <sub>27</sub>  | RY*(1)N <sub>49</sub>                   | 1.17                      | 1.86                    |
| <b>IIC</b>     | 0.033    | LP (1)N <sub>22</sub>    | BD*(1)C <sub>43</sub> -Br <sub>53</sub>  | 7.72                                    | 0.61                      | 0.062                   |
|                |          |                          | BD (1)C <sub>43</sub> -Br <sub>53</sub>  | RY*(1)N <sub>22</sub>                   | 1.19                      | 1.86                    |
| <b>IID</b>     | 0.033    | LP (1)N <sub>48</sub>    | BD*(1)C <sub>14</sub> -Br <sub>23</sub>  | 7.81                                    | 0.61                      | 0.062                   |
|                |          |                          | BD (1)C <sub>14</sub> -Br <sub>23</sub>  | RY*(1)N <sub>48</sub>                   | 1.20                      | 1.87                    |
| <b>IIE</b>     | 0.021    | LP (1)N <sub>54</sub>    | BD*(1)C <sub>14</sub> -Br <sub>23</sub>  | 6.20                                    | 0.62                      | 0.056                   |
|                |          |                          | BD (1)C <sub>14</sub> -Br <sub>23</sub>  | RY*(1)N <sub>54</sub>                   | 1.03                      | 1.84                    |
| <b>IIF</b>     | 0.025    | LP (1)N <sub>71</sub>    | BD*(1)C <sub>14</sub> -Br <sub>49</sub>  | 6.56                                    | 0.62                      | 0.057                   |
|                |          |                          | BD (1)C <sub>14</sub> -Br <sub>49</sub>  | RY*(1)N <sub>71</sub>                   | 1.07                      | 1.84                    |
| <b>IIIA</b>    | 0.017    | LP (1) N <sub>46</sub>   | BD* (1)C <sub>14</sub> -H <sub>24</sub>  | 10.38                                   | 1.01                      | 0.093                   |
|                |          |                          | LP (2) F <sub>20</sub>                   | BD* (1)C <sub>36</sub> -H <sub>45</sub> | 1.15                      | 1.09                    |
| <b>IIIB</b>    | 0.018    | LP (1)N <sub>49</sub>    | BD*(1)C <sub>14</sub> -H <sub>23</sub>   | 10.87                                   | 1.01                      | 0.095                   |
|                |          |                          | LP (2)F <sub>19</sub>                    | BD*(1)C <sub>38</sub> -H <sub>47</sub>  | 1.05                      | 1.09                    |
| <b>IIIC</b>    | 0.021    | LP (1)N <sub>47</sub>    | BD*(1)C <sub>14</sub> -H <sub>25</sub>   | 11.09                                   | 1.01                      | 0.096                   |
|                |          |                          | LP (2)F <sub>21</sub>                    | BD*(1)C <sub>36</sub> -H <sub>45</sub>  | 1.07                      | 1.09                    |

|             |       |                       |                                        |       |      |       |
|-------------|-------|-----------------------|----------------------------------------|-------|------|-------|
| <b>IID</b>  | 0.020 | LP (1)N <sub>48</sub> | BD*(1)C <sub>14</sub> -H <sub>23</sub> | 11.33 | 1.01 | 0.097 |
|             |       | LP (2)F <sub>19</sub> | BD*(1)C <sub>37</sub> -H <sub>46</sub> | 0.99  | 1.09 | 0.029 |
| <b>IIIE</b> | 0.012 | LP (1)N <sub>54</sub> | BD*(1)C <sub>14</sub> -H <sub>32</sub> | 9.69  | 1.02 | 0.090 |
|             |       | LP (2)F <sub>22</sub> | BD*(1)C <sub>44</sub> -H <sub>53</sub> | 1.26  | 1.09 | 0.033 |
| <b>IIIF</b> | 0.005 | LP (1)N <sub>22</sub> | BD*(1)C <sub>43</sub> -H <sub>52</sub> | 10.03 | 1.02 | 0.091 |
|             |       | LP (2)F <sub>48</sub> | BD*(1)C <sub>11</sub> -H <sub>20</sub> | 1.22  | 1.09 | 0.033 |

BD for bonding orbitals, BD\* label for anti-bonding orbitals, CR for core electrons, LP for valence lone pair orbitals and RY for Rydberg state

**Table S7:** Electron density ( $\rho$ ), Laplacian of electron density ( $\nabla^2\rho$ ), Lagrangian kinetic energy  $G(r)$ , Potential energy density  $V(r)$ , electron energy density  $H(r)$  and the ratio of the kinetic to potential electron density  $G(r)/V(r)$  (all are in *au*)

| Complexes   | Interaction | $\rho$ | $\nabla^2\rho$ | $G(r)$ | $V(r)$ | $H(r)$ | $-G(r)/V(r)$ |
|-------------|-------------|--------|----------------|--------|--------|--------|--------------|
| <b>IA</b>   | I-N         | 0.210  | 0.652          | 0.144  | -0.132 | 0.124  | 1.09         |
| <b>IB</b>   | I-N         | 0.217  | 0.669          | 0.153  | -0.146 | 0.755  | 1.05         |
| <b>IC</b>   | I-N         | 0.220  | 0.679          | 0.156  | -0.148 | 0.729  | 1.05         |
| <b>ID</b>   | I-N         | 0.222  | 0.682          | 0.157  | -0.149 | 0.720  | 1.05         |
| <b>IE</b>   | I-N         | 0.206  | 0.638          | 0.146  | -0.137 | 0.826  | 1.07         |
| <b>IF</b>   | I-N         | 0.209  | 0.647          | 0.148  | -0.140 | 0.807  | 1.06         |
| <b>IIA</b>  | Br-N        | 0.198  | 0.627          | 0.140  | -0.123 | 0.1657 | 1.14         |
| <b>IIB</b>  | Br-N        | 0.203  | 0.644          | 0.144  | -0.127 | 0.166  | 1.13         |
| <b>IIC</b>  | Br-N        | 0.206  | 0.650          | 0.146  | -0.129 | 0.165  | 1.13         |
| <b>IID</b>  | Br-N        | 0.207  | 0.653          | 0.146  | -0.130 | 0.165  | 1.12         |
| <b>IIIE</b> | Br-N        | 0.185  | 0.591          | 0.131  | -0.114 | 0.164  | 1.15         |
| <b>IIIF</b> | Br-N        | 0.190  | 0.606          | 0.135  | -0.118 | 0.165  | 1.14         |
| <b>IIIA</b> | H-N         | 0.205  | 0.498          | 0.129  | -0.134 | -0.467 | 0.96         |
|             | F-H         | 0.762  | 0.318          | 0.681  | -0.565 | 0.116  | 1.21         |
| <b>IIIB</b> | H-N         | 0.211  | 0.510          | 0.132  | -0.137 | -0.510 | 0.96         |
|             | F-H         | 0.727  | 0.308          | 0.652  | -0.532 | 0.119  | 1.23         |
| <b>IIIC</b> | H-N         | 0.213  | 0.514          | 0.134  | -0.139 | -0.529 | 0.96         |
|             | F-H         | 0.368  | 0.311          | 0.660  | -0.541 | 0.118  | 1.22         |
| <b>IIID</b> | H-N         | 0.216  | 0.520          | 0.135  | -0.141 | -0.548 | 0.96         |
|             | F-H         | 0.704  | 0.301          | 0.633  | -0.512 | 0.121  | 1.24         |

|              |     |       |       |       |        |        |      |
|--------------|-----|-------|-------|-------|--------|--------|------|
| <b>III E</b> | H-N | 0.198 | 0.483 | 0.124 | -0.128 | -0.403 | 0.97 |
|              | F-H | 0.796 | 0.328 | 0.708 | -0.595 | 0.112  | 1.19 |
| <b>III F</b> | H-N | 0.201 | 0.490 | 0.127 | -0.131 | -0.438 | 0.97 |
|              | F-H | 0.788 | 0.326 | 0.703 | -0.589 | 0.113  | 1.19 |

**Table S8:** First hyperpolarizability  $\beta_o$  (*au*) values of Azo-X with different electron-withdrawing and electron-donating groups

| Code(X)    | Substituent | $\beta_o$         |
|------------|-------------|-------------------|
| <b>I</b>   | <b>A</b>    | $3.2 \times 10^2$ |
|            | <b>B</b>    | $1.0 \times 10^3$ |
|            | <b>C</b>    | $8.8 \times 10^2$ |
|            | <b>D</b>    | $2.3 \times 10^3$ |
|            | <b>E</b>    | $6.0 \times 10^3$ |
|            | <b>F</b>    | $3.5 \times 10^4$ |
| <b>II</b>  | <b>A</b>    | $2.2 \times 10^2$ |
|            | <b>B</b>    | $9.0 \times 10^2$ |
|            | <b>C</b>    | $6.4 \times 10^2$ |
|            | <b>D</b>    | $2.2 \times 10^3$ |
|            | <b>E</b>    | $6.6 \times 10^3$ |
|            | <b>F</b>    | $4.0 \times 10^3$ |
| <b>III</b> | <b>A</b>    | $7.1 \times 10^2$ |
|            | <b>B</b>    | $4.1 \times 10^1$ |
|            | <b>C</b>    | $3.3 \times 10^2$ |
|            | <b>D</b>    | $6.1 \times 10^3$ |
|            | <b>E</b>    | $3.9 \times 10^3$ |
|            | <b>F</b>    | $2.8 \times 10^3$ |

**Table S9:** First hyperpolarizability  $\beta_o$  (*au*) values for urea, *p*-nitroaniline and various stilbenes calculated at different DFT functionals/**6-311++G(2d, 2p)** level of theory

| Reference Molecules                              | $\omega$ B97XD       | B3LYP                | CAM-B3LYP            | B3LYP-D3             | LC-BLYP              | BHandHLYP            |
|--------------------------------------------------|----------------------|----------------------|----------------------|----------------------|----------------------|----------------------|
| Urea                                             | 5.3x10 <sup>1</sup>  | 9.0x10 <sup>1</sup>  | 5.7 x10 <sup>1</sup> | 9.0 x10 <sup>1</sup> | 3.2 x10 <sup>1</sup> | 5.5 x10 <sup>1</sup> |
| <i>p</i> -Nitroaniline                           | 1.2 x10 <sup>3</sup> | 1.6x10 <sup>3</sup>  | 1.3x10 <sup>3</sup>  | 1.6x10 <sup>3</sup>  | 1.1x10 <sup>3</sup>  | 1.2x10 <sup>3</sup>  |
| 4-Nitrostilbene                                  | 3.3x10 <sup>3</sup>  | 8.1x10 <sup>3</sup>  | 4.1x10 <sup>3</sup>  | 8.0x10 <sup>3</sup>  | 2.8x10 <sup>3</sup>  | 4.2x10 <sup>3</sup>  |
| 4-( <i>N,N</i> -dimethylamino) stilbene          | 4.8x10 <sup>3</sup>  | 5.0x10 <sup>3</sup>  | 5.0x10 <sup>3</sup>  | 5.0x10 <sup>3</sup>  | 4.3x10 <sup>3</sup>  | 4.6x10 <sup>3</sup>  |
| 4-[ <i>N,N</i> -dimethylamino]-4'-Nitro stilbene | 1.2x10 <sup>4</sup>  | 2.9 x10 <sup>4</sup> | 1.5x10 <sup>4</sup>  | 2.9x10 <sup>4</sup>  | 8.3x10 <sup>3</sup>  | 1.5x10 <sup>4</sup>  |
| 4-Amine-4'-nitro stilbene                        | 8.5x10 <sup>3</sup>  | 2.0x10 <sup>4</sup>  | 1.1x10 <sup>4</sup>  | 2.0x10 <sup>4</sup>  | 6.1x10 <sup>3</sup>  | 1.1x10 <sup>4</sup>  |
| 4-Bromo-4'-nitro stilbene                        | 4.3x10 <sup>3</sup>  | 1.1x10 <sup>4</sup>  | 5.3x10 <sup>3</sup>  | 1.1x10 <sup>4</sup>  | 2.8x10 <sup>3</sup>  | 5.4x10 <sup>3</sup>  |
| 4-Alkoxy-4'-nitro stilbene                       | 6.7x10 <sup>3</sup>  | 1.6x10 <sup>4</sup>  | 8.2x10 <sup>3</sup>  | 1.6x10 <sup>4</sup>  | 4.6x10 <sup>3</sup>  | 8.1x10 <sup>3</sup>  |

**Table S10:** First hyperpolarizability  $\beta_o$  (*au*) values for urea, *p*-nitroaniline and various stilbenes calculated at **CAM-B3LYP**/different basis sets level of theory

| Reference Molecules                              | 6-31+G(d, p)         | 6-311+G(d, p)       | 6-311++G(2d, 2p)     | 6-311++G(3d, 3p)     |
|--------------------------------------------------|----------------------|---------------------|----------------------|----------------------|
| Urea                                             | 2.9x10 <sup>1</sup>  | 4.2x10 <sup>1</sup> | 5.7 x10 <sup>1</sup> | 5.7 x10 <sup>1</sup> |
| <i>p</i> -Nitroaniline                           | 1.4 x10 <sup>3</sup> | 1.4x10 <sup>3</sup> | 1.3x10 <sup>3</sup>  | 1.3x10 <sup>3</sup>  |
| 4-Nitrostilbene                                  | 4.2x10 <sup>3</sup>  | 4.3x10 <sup>3</sup> | 4.1x10 <sup>3</sup>  | 4.1x10 <sup>3</sup>  |
| 4-( <i>N,N</i> -dimethylamino) stilbene          | 5.1x10 <sup>3</sup>  | 5.1x10 <sup>3</sup> | 5.0x10 <sup>3</sup>  | 5.0x10 <sup>3</sup>  |
| 4-[ <i>N,N</i> -dimethylamino]-4'-Nitro stilbene | 1.5x10 <sup>4</sup>  | 1.5x10 <sup>4</sup> | 1.5x10 <sup>4</sup>  | 1.5x10 <sup>4</sup>  |
| 4-Amine-4'-nitro stilbene                        | 1.1x10 <sup>4</sup>  | 1.1x10 <sup>4</sup> | 1.1x10 <sup>4</sup>  | 1.0x10 <sup>4</sup>  |

|                                    |                     |                     |                     |                     |
|------------------------------------|---------------------|---------------------|---------------------|---------------------|
| <b>4-Bromo-4' -nitro stilbene</b>  | 5.4x10 <sup>3</sup> | 5.5x10 <sup>3</sup> | 5.3x10 <sup>3</sup> | 5.2x10 <sup>3</sup> |
| <b>4-Alkoxy-4' -nitro stilbene</b> | 8.4x10 <sup>3</sup> | 8.4x10 <sup>3</sup> | 8.2x10 <sup>3</sup> | 8.1x10 <sup>3</sup> |

**Table S11:** Static first hyperpolarizability  $\beta_o$  (au) values of the designed supramolecular complexes at  $\omega$ **B97XD/6-311++G(2d, 2p)** and **CAM-B3LYP/6-31+G(d, p)**

| <b>Complexes</b> | $\beta_o$<br><b>(<math>\omega</math>B97XD/6-311++G(2d, 2p))</b> | $\beta_o$<br><b>(CAM-B3LYP/6-31+G(d, p))</b> |
|------------------|-----------------------------------------------------------------|----------------------------------------------|
| <b>IA</b>        | 8.5x10 <sup>3</sup>                                             | 9.3x10 <sup>3</sup>                          |
| <b>IB</b>        | 1.1x10 <sup>4</sup>                                             | 1.2x10 <sup>4</sup>                          |
| <b>IC</b>        | 1.1x10 <sup>4</sup>                                             | 1.3x10 <sup>4</sup>                          |
| <b>ID</b>        | 1.3x10 <sup>4</sup>                                             | 1.5x10 <sup>4</sup>                          |
| <b>IE</b>        | 1.1x10 <sup>3</sup>                                             | 1.6x10 <sup>3</sup>                          |
| <b>IF</b>        | 4.3x10 <sup>3</sup>                                             | 5.1x10 <sup>3</sup>                          |
| <b>IIA</b>       | 6.8x10 <sup>3</sup>                                             | 8.0x10 <sup>3</sup>                          |
| <b>IIB</b>       | 9.0x10 <sup>3</sup>                                             | 1.1x10 <sup>4</sup>                          |
| <b>IIC</b>       | 9.4x10 <sup>3</sup>                                             | 1.1x10 <sup>4</sup>                          |
| <b>IID</b>       | 1.1x10 <sup>4</sup>                                             | 1.3x10 <sup>4</sup>                          |
| <b>IIIE</b>      | 2.6x10 <sup>3</sup>                                             | 6.0x10 <sup>1</sup>                          |
| <b>IIIF</b>      | 2.8x10 <sup>3</sup>                                             | 3.6x10 <sup>3</sup>                          |
| <b>IIIA</b>      | 3.8x10 <sup>3</sup>                                             | 4.3x10 <sup>3</sup>                          |
| <b>IIIB</b>      | 5.2x10 <sup>3</sup>                                             | 5.7x10 <sup>3</sup>                          |
| <b>IIIC</b>      | 5.1x10 <sup>3</sup>                                             | 5.6x10 <sup>3</sup>                          |
| <b>IIID</b>      | 6.7x10 <sup>3</sup>                                             | 7.3x10 <sup>3</sup>                          |
| <b>IIIE</b>      | 3.2x10 <sup>3</sup>                                             | 3.3x10 <sup>3</sup>                          |
| <b>IIIF</b>      | 1.6x10 <sup>3</sup>                                             | 1.9x10 <sup>3</sup>                          |

**Table S12:** First hyperpolarizability  $\beta_o$  (au) values of *trans* and *cis* supramolecular complexes

| <b>Complexes</b> | <b><math>\beta_o</math></b> |
|------------------|-----------------------------|
| <b>IA</b>        | $8.5 \times 10^3$           |
| <b>iA</b>        | $7.0 \times 10^3$           |
| <b>IB</b>        | $1.1 \times 10^4$           |
| <b>iB</b>        | $7.2 \times 10^3$           |
| <b>IC</b>        | $1.1 \times 10^4$           |
| <b>iC</b>        | $7.5 \times 10^3$           |
| <b>ID</b>        | $1.3 \times 10^4$           |
| <b>iD</b>        | $7.6 \times 10^3$           |
| <b>IIA</b>       | $6.8 \times 10^3$           |
| <b>iiA</b>       | $5.7 \times 10^3$           |
| <b>IID</b>       | $1.1 \times 10^4$           |
| <b>iiD</b>       | $6.1 \times 10^3$           |
| <b>IIIA</b>      | $3.8 \times 10^3$           |
| <b>iiiA</b>      | $4.0 \times 10^3$           |
| <b>IIID</b>      | $6.7 \times 10^3$           |
| <b>iiiD</b>      | $4.1 \times 10^3$           |
